# Supplementary material for: Ph3P/ICH2CH2I-promoted reductive deoxygenation of alcohols
Source: Royal Society of Chemistry journal article supplement (doi:10.1039/d3ob01698f), 2023-01-01
Supplement: d3ob01698f1.pdf [file d3ob01698f1.pdf]

## Supporting Information

### Ph<sub>3</sub>P/ICH<sub>2</sub>CH<sub>2</sub>I-promoted reductive deoxygenation of alcohols

Wei-Ying Tang,<sup>a,c,#</sup> Xing Zheng,<sup>a,b,#</sup> Xu Yao,<sup>a</sup> Jin-Hong Lin,<sup>\*c,e</sup> Qu-Tong Zheng,<sup>\*d</sup> and Ji-Chang Xiao<sup>\*c</sup>

<sup>a</sup>Institute of Pharmacy and Pharmacology, Hengyang Medicinal School, University of South China, Hengyang, Hunan, 421001, China.

<sup>b</sup>Department of Pharmacy, Hunan Vocational College of Science and Technology, Third Zhongyi Shan Road, Changsha, Hunan, 410004, China.

<sup>c</sup>Department of Chemistry, Innovative Drug Research Center, Shanghai University, 200444 Shanghai, China.

<sup>d</sup>Hunan University of Chinese Medicine, School of Pharmacy, Changsha, Hunan 410208, China.

<sup>e</sup>Key Laboratory of Organofluorine Chemistry, Shanghai Institute of Organic Chemistry, University of Chinese Academy of Sciences, Chinese Academy of Sciences, Shanghai, 200032, China.

<sup>#</sup>These two authors contributed equally to this article.

Corresponding authors: [jilin@sioc.ac.cn](mailto:jilin@sioc.ac.cn), [jilin@shu.edu.cn](mailto:jilin@shu.edu.cn) (J.-H. Lin), [812756794@qq.com](mailto:812756794@qq.com) (Q. -T. Zheng), [jchxiao@sioc.ac.cn](mailto:jchxiao@sioc.ac.cn) (J.-C. Xiao).

#### Contents

|                                                                                                     |    |
|-----------------------------------------------------------------------------------------------------|----|
| 1. General Information .....                                                                        | 2  |
| 2. General Procedure for the reductive deoxygenation of alcohols .....                              | 2  |
| 3. <sup>1</sup> H, <sup>19</sup> F and <sup>13</sup> C NMR Spectral data of all the compounds ..... | 2  |
| 4. Copies of <sup>1</sup> H NMR, <sup>19</sup> F NMR and <sup>13</sup> C NMR .....                  | 10 |
| 5. References .....                                                                                 | 38 |

## 1. General Information

The  $^1\text{H}$ ,  $^{13}\text{C}$  and  $^{19}\text{F}$  NMR spectra were recorded on 400MHz NMR spectrometers (400 MHz for  $^1\text{H}$ , 101MHz for  $^{13}\text{C}$  and 375 MHz for  $^{19}\text{F}$  respectively). Coupling constants ( $J$ ) are reported in Hz. The following abbreviations were used to explain the multiplicities: s = singlet, d = doublet, t = triplet, q = quartet, m = multiplet, sept = septet. All reactions were monitored by TLC or  $^1\text{H}$  NMR. Low-resolution mass spectrum (MS) was obtained on GC-MS (EI) or LC-MS (ESI), and high-resolution mass spectrometry (HRMS) data were measured on a Waters Premier GC-TOF MS instrument with an electron impact (EI) ionization mode, or on a Thermo Scientific Q Exactive HF Orbitrap-FTMS instrument with electrospray ionization (ESI) mode. Flash column chromatography was carried out using 300–400 mesh silica gel at medium pressure. Melting points were measured on a melting point apparatus. Unless otherwise noted, all reagents and solvents were obtained commercially and used without further purification. All reactions were performed in 25 mL sealed tube. All starting materials are commercially available, and were purchased and directly used without further purification.

## 2. General Procedure for the reductive deoxygenation of alcohols

Into a solution of alcohol **1** (0.5 mmol, 1.0 equiv) and  $\text{Ph}_3\text{P}$  (0.6 mmol, 157.4 mg, 1.2 equiv) in DMF (5 mL) in a 25 mL sealed tube was added  $\text{ICH}_2\text{CH}_2\text{I}$  (0.6 mmol, 169.1 mg, 1.2 equiv) under a  $\text{N}_2$  atmosphere. After the reagents were completely dissolved,  $\text{NaBH}_4$  (1.25 mmol, 2.5 equiv) was added. The tube was sealed and the resulting mixture was stirred at room temperature for 2 hours. Dichloromethane was added and the resulting solution was washed with water. The organic layer was removed by concentration under reduced pressure and the residue was subjected to flash column chromatography to give products.

## 3. $^1\text{H}$ , $^{19}\text{F}$ and $^{13}\text{C}$ NMR Spectral data of all the compounds

### 4-methyl-1,1'-biphenyl (2a)

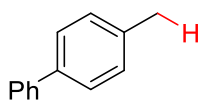

**2a**

Eluent: petroleum ether, white solid, 78 mg, 93% yield.  $^1\text{H}$  NMR (400 MHz, Chloroform- $d$ )  $\delta$  7.62 (d,  $J$  = 7.3 Hz, 2H), 7.54 (d,  $J$  = 8.0 Hz, 2H), 7.47 (t,  $J$  = 7.4 Hz, 2H), 7.36 (t,  $J$  = 7.3 Hz, 1H), 7.29 (d,  $J$  = 7.9 Hz, 2H), 2.44 (s, 3H).  $^{13}\text{C}$  NMR (101 MHz, Chloroform- $d$ )  $\delta$  144.2, 138.4, 137.0, 129.5, 128.8, 127.03, 127.01, 21.2. Spectroscopic data are in agreement with those previously reported.<sup>1</sup>

### 1,3-dichloro-2-methylbenzene (2b)

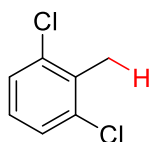

**2b**

Eluent: petroleum ether, colorless transparent oil, 68 mg, 84% yield.  $^1\text{H}$  NMR (400 MHz, Chloroform- $d$ )  $\delta$  7.25 (d,  $J$  = 8.0 Hz, 2H), 7.03 (t,  $J$  = 8.0 Hz, 1H), 2.46 (s, 3H).  $^{13}\text{C}$  NMR (101 MHz, Chloroform- $d$ )  $\delta$  135.5, 134.4, 127.7, 127.1, 17.4. Spectroscopic data are in agreement with those previously reported.<sup>2</sup>

### 1,3-dibromo-2-methylbenzene (2c)

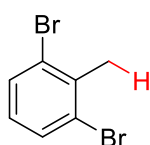

**2c**

Eluent: petroleum ether, colorless transparent oil, 100 mg, 80% yield.  $^1\text{H}$  NMR (400 MHz, Chloroform- $d$ )  $\delta$  7.48 (d,  $J$  = 8.0 Hz, 2H), 6.87 (t,  $J$  = 8.0 Hz, 1H), 2.56 (s, 3H).  $^{13}\text{C}$  NMR (101 MHz, Chloroform- $d$ )  $\delta$  137.5, 131.8, 128.1, 125.4, 23.7. Spectroscopic data are in agreement with those previously reported.<sup>3</sup>

### 1-ethyl-4-iodobenzene (2d)

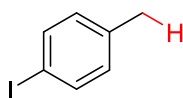

**2d**

Eluent: petroleum ether, white solid, 69 mg, 63% yield.  $^1\text{H}$  NMR (400 MHz, Chloroform- $d$ )  $\delta$  7.58 (d,  $J$  = 8.1 Hz, 2H), 6.94 (d,  $J$  = 7.9 Hz, 1H), 2.31 (s, 3H).  $^{13}\text{C}$  NMR (101 MHz, Chloroform- $d$ )  $\delta$  137.4, 137.2, 131.2, 90.2, 21.0. Spectroscopic data are in agreement with those previously reported.<sup>4</sup>

### 2-fluoro-5-methylbenzonitrile (2e)

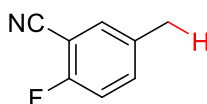

**2e**

Eluent: petroleum ether/EtOAc = 10/1, white solid, 51 mg, 75% yield.  $^1\text{H}$  NMR (400 MHz, Chloroform- $d$ )  $\delta$  7.40-7.36 (m, 2H), 7.09 (t,  $J$  = 8.6 Hz, 1H), 2.36 (s, 3H).  $^{19}\text{F}$  NMR (376 MHz, Chloroform- $d$ )  $\delta$  -111.78 – -111.83 (m, 1F).  $^{13}\text{C}$  NMR (101 MHz, Chloroform- $d$ )  $\delta$  161.4 (d,  $J$  = 256.3 Hz), 135.5 (d,  $J$  = 7.8 Hz), 134.7 (d,  $J$  = 3.7 Hz), 133.4, 116.1 (d,  $J$  = 19.3 Hz), 114.1, 101.0 (d,  $J$  = 15.5 Hz), 20.4. Spectroscopic data are in agreement with those previously reported.<sup>5</sup>

### methyl 4-methylbenzoate (2f)

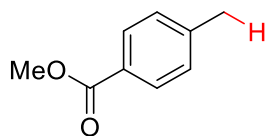

**2f**

Eluent: petroleum ether/EtOAc = 20/1, Yellow oil, 54 mg, 72% yield.  $^1\text{H}$  NMR (400 MHz, Chloroform-d)  $\delta$  7.92 (d,  $J$  = 8.1 Hz, 2H), 7.21 (d,  $J$  = 8.0 Hz, 2H), 3.87 (s, 3H), 2.38 (s, 3H).  $^{13}\text{C}$  NMR (101 MHz, Chloroform-d)  $\delta$  167.1, 143.5, 129.6, 129.0, 127.4, 51.9, 21.6. Spectroscopic data are in agreement with those previously reported.<sup>6</sup>

### methyl 3-methyl-5-nitrobenzoate (2g)

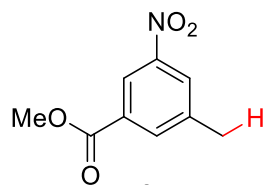

**2g**

Eluent: petroleum ether/EtOAc = 10/1, white solid, 78 mg, 80% yield. Melting point: 77.7-78.6 °C.  $^1\text{H}$  NMR (400 MHz, Chloroform-d)  $\delta$  8.63 (s, 1H), 8.20 (s, 1H), 8.16 (s, 1H), 3.96 (s, 3H), 2.51 (s, 3H).  $^{13}\text{C}$  NMR (101 MHz, Chloroform-d)  $\delta$  165.2, 148.3, 140.4, 135.9, 131.6, 127.8, 121.8, 52.7, 21.2. HRMS (FI)  $m/z$   $[M]^+$  calcd for  $\text{C}_{16}\text{H}_{16}\text{O}_4$  195.0532, found 195.0523. IR (KBr) ( $\text{cm}^{-1}$ ) 3094, 3075, 2956, 2852, 1728, 1648, 1590, 1536, 1488, 1357, 1298, 1223, 913, 887, 738, 664.

### 1-methyl-4-(methylsulfonyl)-benzene (2h)

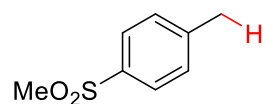

**2h**

Eluent: petroleum ether/EtOAc = 3/1, white solid, 81 mg, 95% yield.  $^1\text{H}$  NMR (400 MHz, Chloroform-d)  $\delta$  7.81 (d,  $J$  = 8.1 Hz, 2H), 7.35 (d,  $J$  = 7.9 Hz, 2H), 3.02 (s, 3H), 2.44 (s, 3H).  $^{13}\text{C}$  NMR (101 MHz, Chloroform-d)  $\delta$  144.7, 137.7, 130.0, 127.4, 44.6, 21.6. Spectroscopic data are in agreement with those previously reported.<sup>7</sup>

### *N*-(*p*-tolyl)acetamide (2i)

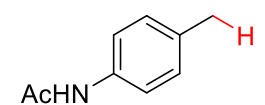

**2i**

Eluent: petroleum ether/EtOAc = 1/1, white solid, 69 mg, 92% yield.  $^1\text{H}$  NMR (400 MHz, Chloroform- $d$ )  $\delta$  7.80 (s, 1H), 7.37 (d,  $J$  = 8.3 Hz, 2H), 7.09 (d,  $J$  = 8.1 Hz, 2H), 2.30 (s, 3H), 2.13 (s, 3H).  $^{13}\text{C}$  NMR (101 MHz, Chloroform- $d$ )  $\delta$  168.7, 135.4, 133.9, 129.4, 120.2, 24.4, 20.9. Spectroscopic data are in agreement with those previously reported.<sup>8</sup>

#### 4,4,5,5-tetramethyl-2-(*p*-tolyl)-1,3,2-dioxaborolane (2j)

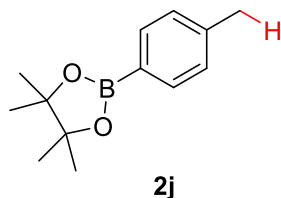

Eluent: petroleum ether/EtOAc = 20/1, white solid, 92 mg, 84% yield.  $^1\text{H}$  NMR (400 MHz, Chloroform- $d$ )  $\delta$  7.72 (d,  $J$  = 7.8 Hz, 2H), 7.20 (d,  $J$  = 7.7 Hz, 2H), 2.38 (s, 3H), 1.35 (s, 12H).  $^{13}\text{C}$  NMR (101 MHz, Chloroform- $d$ )  $\delta$  141.4, 134.8, 128.5, 83.6, 24.9, 21.7. Spectroscopic data are in agreement with those previously reported.<sup>9</sup>

#### 1-(*tert*-butyl)-4-methylbenzene (2k)

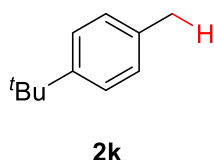

Eluent: petroleum ether, colorless transparent oil, 53 mg, 71% yield.  $^1\text{H}$  NMR (400 MHz, Chloroform- $d$ )  $\delta$  7.32 (d,  $J$  = 8.2 Hz, 2H), 7.15 (d,  $J$  = 8.0 Hz, 2H), 2.35 (s, 3H), 1.34 (s, 9H).  $^{13}\text{C}$  NMR (101 MHz, Chloroform- $d$ )  $\delta$  148.2, 134.8, 128.8, 125.2, 34.3, 31.4, 20.9. Spectroscopic data are in agreement with those previously reported.<sup>10</sup>

#### 1,3-dimethoxy-5-methylbenzene (2l)

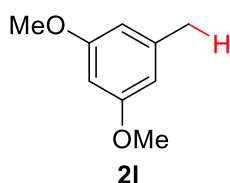

Eluent: petroleum ether/EtOAc = 20/1, colorless transparent oil, 67 mg, 88% yield.  $^1\text{H}$  NMR (400 MHz, Chloroform- $d$ )  $\delta$  6.37 (s, 2H), 6.32 (s, 1H), 3.80 (s, 6H), 2.34 (s, 3H).  $^{13}\text{C}$  NMR (101 MHz, Chloroform- $d$ )  $\delta$  160.8, 140.2, 107.1, 97.6, 55.2, 21.8. Spectroscopic data are in agreement with those previously reported.<sup>11</sup>

#### 1-methyl-3-phenoxybenzene (2m)

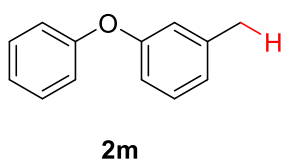

Eluent: pentane, yellow oil, 67 mg, 73% yield.  $^1\text{H}$  NMR (400 MHz, Chloroform- $d$ )  $\delta$  7.33 (t,  $J$  = 8.0 Hz, 2H), 7.21 (t,  $J$  = 7.8 Hz, 1H), 7.09 (t,  $J$  = 7.4 Hz, 1H), 7.01 (d,  $J$  = 7.6 Hz, 2H), 6.92 (d,  $J$  = 7.5 Hz, 1H), 6.86-6.82 (m, 2H), 2.35 (s, 3H).  $^{13}\text{C}$  NMR (101 MHz, Chloroform- $d$ )  $\delta$  157.2, 157.4, 139.9, 129.7, 129.4, 124.0, 123.1, 119.6, 118.9, 115.9, 21.4. Spectroscopic data are in agreement with those previously reported.<sup>12</sup>

### 1-cyclopropyl-4-methylbenzene (2n)

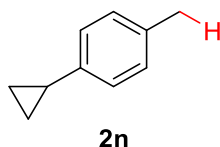

Eluent: pentane, colorless transparent oil, 46 mg, 70% yield.  $^1\text{H}$  NMR (400 MHz, Chloroform- $d$ )  $\delta$  7.09 (d,  $J$  = 7.9 Hz, 2H), 7.00 (d,  $J$  = 8.0 Hz, 2H), 2.33 (s, 3H), 1.92-1.85 (m, 1H), 0.98-0.88 (m, 2H), 0.70-0.66 (m, 2H).  $^{13}\text{C}$  NMR (101 MHz, Chloroform- $d$ )  $\delta$  140.9, 134.8, 129.0, 125.6, 21.0, 15.0, 8.9. Spectroscopic data are in agreement with those previously reported.<sup>13</sup>

### 2-methylbenzo[*b*]thiophene (2o)

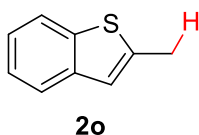

Eluent: petroleum ether/EtOAc = 100/1, white solid, 59 mg, 79% yield.  $^1\text{H}$  NMR (400 MHz, Chloroform- $d$ )  $\delta$  7.77 (d,  $J$  = 7.9 Hz, 1H), 7.67 (d,  $J$  = 7.8 Hz, 1H), 7.35-7.25 (m, 2H), 6.99 (s, 1H), 2.61 (s, 3H).  $^{13}\text{C}$  NMR (101 MHz, Chloroform- $d$ )  $\delta$  140.9, 140.5, 139.7, 124.1, 123.4, 122.6, 122.0, 121.6, 16.2. Spectroscopic data are in agreement with those previously reported.<sup>14</sup>

### 5-methylbenzo[*d*][1,3]dioxole (2p)

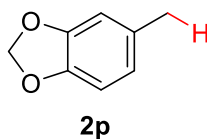

Eluent: petroleum ether/EtOAc = 20/1, colorless transparent oil, 48 mg, 71% yield.  $^1\text{H}$  NMR (400 MHz, Chloroform- $d$ )  $\delta$  6.75-6.64 (m, 3H), 5.93 (s, 2H), 2.31 (s, 3H).  $^{13}\text{C}$  NMR (101 MHz, Chloroform- $d$ )  $\delta$  147.5, 145.3, 131.5, 121.5, 109.6, 108.0, 100.7, 21.2. Spectroscopic data are in agreement with those previously reported.<sup>15</sup>

### 1-(*p*-Tolyl)-1*H*-pyrazole (2q)

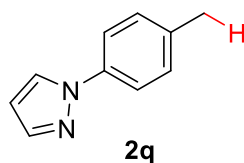

Eluent: petroleum ether/EtOAc = 10/1, white solid, 76 mg, 96% yield.  $^1\text{H}$  NMR (400 MHz, Chloroform- $d$ )  $\delta$  7.85 (d,

$J = 2.2$  Hz, 1H), 7.69 (d,  $J = 1.8$  Hz, 1H), 7.55 (d,  $J = 8.3$  Hz, 2H), 7.22 (d,  $J = 7.8$  Hz, 2H), 6.42 (t,  $J = 2.2$  Hz, 1H), 2.36 (s, 3H).  $^{13}\text{C}$  NMR (101 MHz, Chloroform- $d$ )  $\delta$  140.8, 138.0, 136.2, 129.9, 126.7, 119.2, 107.3, 20.9. Spectroscopic data are in agreement with those previously reported.<sup>16</sup>

### 9-methylanthracene (2r)

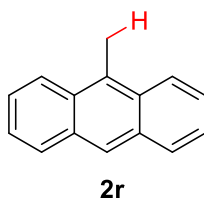

Eluent: pentane, yellow solid, 72 mg, 75% yield.  $^1\text{H}$  NMR (400 MHz, Chloroform- $d$ )  $\delta$  8.33-8.27 (m, 3H), 8.00 (d,  $J = 7.8$  Hz, 2H), 7.53-7.45 (m, 4H), 3.10 (s, 3H).  $^{13}\text{C}$  NMR (101 MHz, Chloroform- $d$ )  $\delta$  131.5, 130.2, 129.1, 125.34, 125.28, 124.8, 124.7, 14.0. Spectroscopic data are in agreement with those previously reported.<sup>17</sup>

### N-(4-(4-fluorophenyl)-6-isopropyl-5-methylpyrimidin-2-yl)-N-methylmethanesulfonamide (2s)

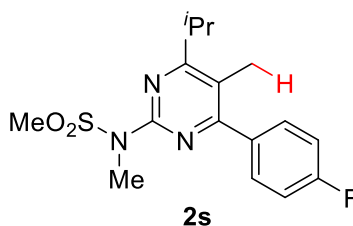

Eluent: petroleum ether/EtOAc = 10/1, white solid, 139 mg, 82% yield.  $^1\text{H}$  NMR (400 MHz, Chloroform- $d$ )  $\delta$  7.56-7.52 (m, 2H), 7.14-7.09 (m, 2H), 3.52 (s, 3H), 3.48 (s, 3H), 3.28 (sept,  $J = 6.5$  Hz, 1H), 2.25 (s, 3H), 1.28 (d,  $J = 6.7$  Hz, 6H).  $^{19}\text{F}$  NMR (376 MHz, Chloroform- $d$ )  $\delta$  -111.96 – -112.04 (m, 1F).  $^{13}\text{C}$  NMR (101 MHz, Chloroform- $d$ )  $\delta$  175.4, 164.7, 163.1 (d,  $J = 249$  Hz), 156.8, 134.8 (d,  $J = 3.3$  Hz), 131.3 (d,  $J = 8.5$  Hz), 118.7, 115.2 (d,  $J = 21.7$  Hz), 42.3, 33.2, 31.9, 21.3, 14.3. Spectroscopic data are in agreement with those previously reported.<sup>18</sup>

### 2-ethylnaphthalene (2t)

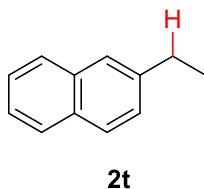

Eluent: petroleum ether, colorless transparent oil, 66 mg, 84% yield.  $^1\text{H}$  NMR (400 MHz, Chloroform- $d$ )  $\delta$  7.87-7.81 (m, 3H), 7.68 (s, 1H), 7.52-7.44 (m, 2H), 7.41 (d,  $J = 8.4$  Hz, 1H), 2.87 (q,  $J = 7.6$  Hz, 2H), 1.39 (t,  $J = 7.6$  Hz, 3H).  $^{13}\text{C}$  NMR (101 MHz, Chloroform- $d$ )  $\delta$  141.8, 133.8, 132.0, 127.8, 127.6, 127.5, 127.1, 125.9, 125.6, 125.0, 29.1, 15.6. Spectroscopic data are in agreement with those previously reported.<sup>8</sup>

### 4-ethyl-1,1'-biphenyl (2u)

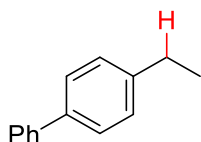

**2u**

Eluent: petroleum ether, white solid, 64 mg, 70% yield.  $^1\text{H}$  NMR (400 MHz, Chloroform- $d$ )  $\delta$  7.66-7.63 (m, 2H), 7.61-7.57 (m, 2H), 7.49 (t,  $J$  = 7.6 Hz, 2H), 7.41-7.33 (m, 3H), 2.76 (q,  $J$  = 7.6 Hz, 2H), 1.35 (t,  $J$  = 7.6 Hz, 3H).  $^{13}\text{C}$  NMR (101 MHz, Chloroform- $d$ )  $\delta$  143.4, 141.3, 138.7, 128.8, 128.3, 127.13, 127.06, 127.0, 28.6, 15.6. Spectroscopic data are in agreement with those previously reported.<sup>19</sup>

### Propoxybenzene (2v)

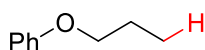

**2v**

Eluent: petroleum ether/EtOAc = 100/1, colorless transparent oil, 27 mg, 40% yield.  $^1\text{H}$  NMR (400 MHz, Chloroform- $d$ )  $\delta$  7.30 (t,  $J$  = 7.7 Hz, 2H), 6.97-6.92 (m, 3H), 3.94 (t,  $J$  = 6.6 Hz, 2H), 1.86-1.79 (m, 2H), 1.07 (t,  $J$  = 7.4 Hz, 3H).  $^{13}\text{C}$  NMR (101 MHz, Chloroform- $d$ )  $\delta$  159.2, 129.4, 120.5, 114.5, 69.4, 22.6, 10.6. Spectroscopic data are in agreement with those previously reported.<sup>20</sup>

### methyl 4-butylbenzoate (2w)

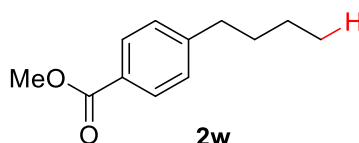

**2w**

Eluent: petroleum ether/EtOAc = 50/1, colorless transparent oil, 53 mg, 55% yield.  $^1\text{H}$  NMR (400 MHz, Chloroform- $d$ )  $\delta$  7.94 (d,  $J$  = 8.0 Hz, 2H), 7.23 (d,  $J$  = 8.0 Hz, 2H), 3.89 (s, 3H), 2.65 (t,  $J$  = 7.8 Hz, 2H), 1.64-1.57 (m, 2H), 1.39-1.30 (m, 2H), 0.92 (t,  $J$  = 7.3 Hz, 3H).  $^{13}\text{C}$  NMR (101 MHz, Chloroform- $d$ )  $\delta$  167.2, 148.5, 129.6, 128.4, 127.6, 51.9, 35.7, 33.3, 22.3, 13.9. Spectroscopic data are in agreement with those previously reported.<sup>21</sup>

### 1-methoxy-4-propylbenzene (2x)

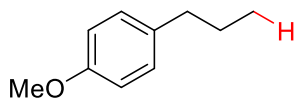

**2x**

Eluent: pentane, colorless transparent oil, 34 mg, 46% yield.  $^1\text{H}$  NMR (400 MHz, Chloroform- $d$ )  $\delta$  7.13 (d,  $J$  = 8.6 Hz, 2H), 6.86 (d,  $J$  = 8.6 Hz, 2H), 3.82 (s, 3H), 2.57 (t,  $J$  = 7.7 Hz, 2H), 1.70-1.60 (m, 2H), 0.97 (t,  $J$  = 7.3 Hz, 3H).  $^{13}\text{C}$  NMR (101 MHz, Chloroform- $d$ )  $\delta$  157.7, 134.8, 129.3, 113.7, 55.2, 37.2, 24.8, 13.8. Spectroscopic data are in agreement with those previously reported.<sup>22</sup>

### 2-decyl-5,6-dimethoxy-3-methylcyclohexa-2,5-diene-1,4-dione (2y)



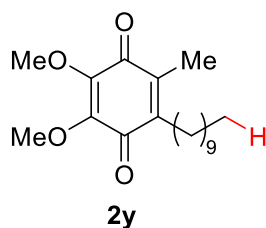

Eluent: petroleum ether/EtOAc = 5/1, yellow oi, 92 mg, 57% yield.  $^1\text{H}$  NMR (400 MHz, Chloroform-d)  $\delta$  3.98 (s, 3H), 3.97 (s, 3H), 2.44 (t,  $J$  = 7.4 Hz, 2H), 2.00 (s, 3H), 1.39-1.25 (m, 16H), 0.87 (t,  $J$  = 6.8 Hz, 3H).  $^{13}\text{C}$  NMR (101 MHz, Chloroform-d)  $\delta$  184.7, 184.1, 144.30, 144.28, 143.1, 138.6, 61.1, 31.9, 29.8, 29.6, 29.5, 29.4, 29.3, 28.7, 26.4, 22.7, 14.1, 11.9. HRMS (FI)  $m/z$   $[\text{M}]^+$  calcd for  $\text{C}_{19}\text{H}_{30}\text{O}_4$  322.2144, found 322.2145. IR (KBr) ( $\text{cm}^{-1}$ ) 2926, 2854, 1651, 1610, 1451, 1265, 1219, 772, 673.

**(E)-1-(benzyloxy)-3-(prop-1-en-1-yl)benzene (2z)**

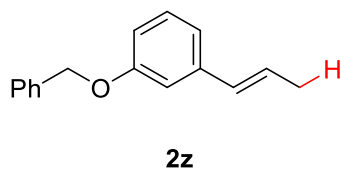

Eluent: pentane, yellow oil, 91 mg, 81% yield.  $^1\text{H}$  NMR (400 MHz, Chloroform-d)  $\delta$  7.50-7.24 (m, 6H), 7.03-6.86 (m, 3H), 6.43 (dd,  $J$  = 15.7, 1.7 Hz, 1H), 6.33-6.24 (m, 1H), 5.10 (s, 2H), 1.93 (dd,  $J$  = 6.5, 1.6 Hz, 3H).  $^{13}\text{C}$  NMR (101 MHz, Chloroform-d)  $\delta$  159.1, 139.6, 137.2, 131.0, 129.6, 128.6, 128.0, 127.6, 126.2, 118.9, 113.3, 112.4, 70.0, 18.6. HRMS (FI)  $m/z$   $[\text{M}]^+$  calcd for  $\text{C}_{16}\text{H}_{16}\text{O}$  224.1201, found 224.1193. IR (KBr) ( $\text{cm}^{-1}$ ) 3064, 3026, 2912, 1655, 1596, 1488, 1438, 1219, 1156, 962, 771, 695.

**methyl 4-(prop-1-yn-1-yl)benzoate (2aa)**

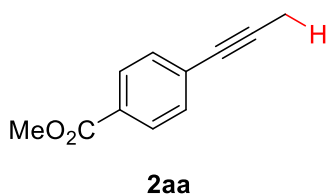

Eluent: petroleum ether/EtOAc = 20/1, colorless transparent oil, 71 mg, 82% yield.  $^1\text{H}$  NMR (400 MHz, Chloroform-d)  $\delta$  7.93 (d,  $J$  = 8.1 Hz, 2H), 7.42 (d,  $J$  = 8.3 Hz, 2H), 3.88 (s, 3H), 2.05 (s, 3H).  $^{13}\text{C}$  NMR (101 MHz, Chloroform-d)  $\delta$  166.6, 131.4, 129.4, 128.87, 128.86, 89.3, 79.3, 52.1, 4.4. Spectroscopic data are in agreement with those previously reported.<sup>23</sup>

#### 4. Copies of $^1\text{H}$ NMR, $^{19}\text{F}$ NMR and $^{13}\text{C}$ NMR

$^1\text{H}$  NMR (400 MHz,  $\text{CDCl}_3$ ) of **2a**

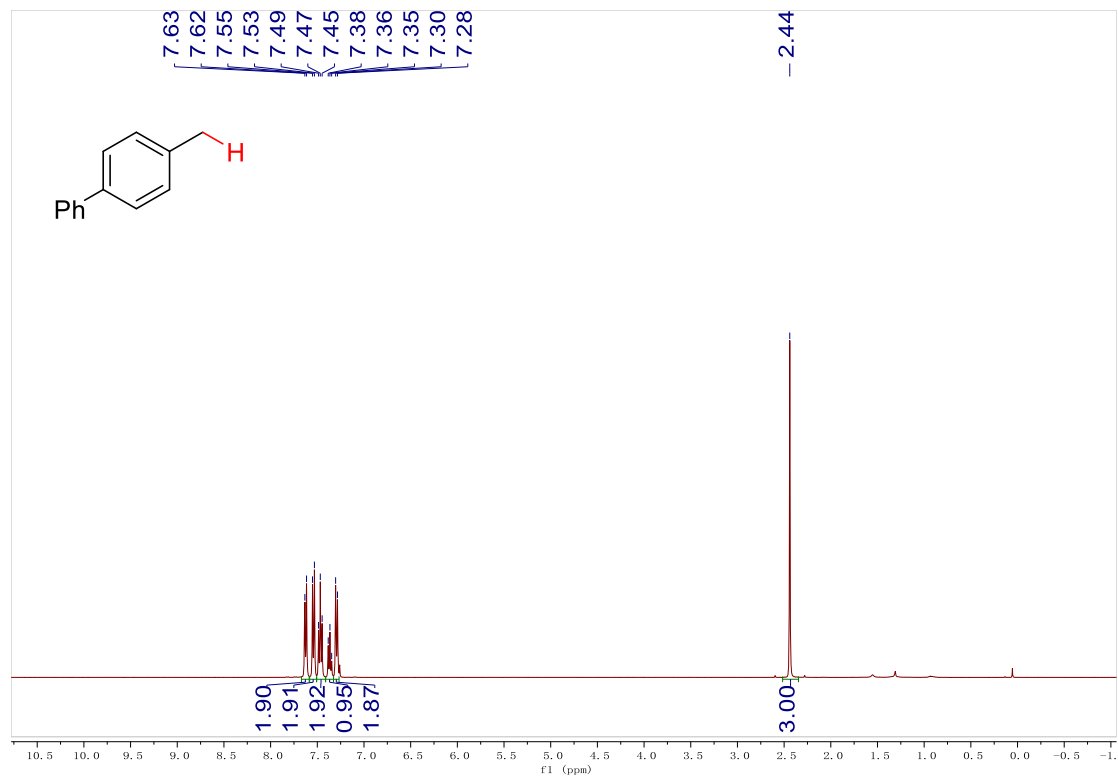

$^{13}\text{C}\{^1\text{H}\}$  NMR (101 MHz,  $\text{CDCl}_3$ ) of **2a**

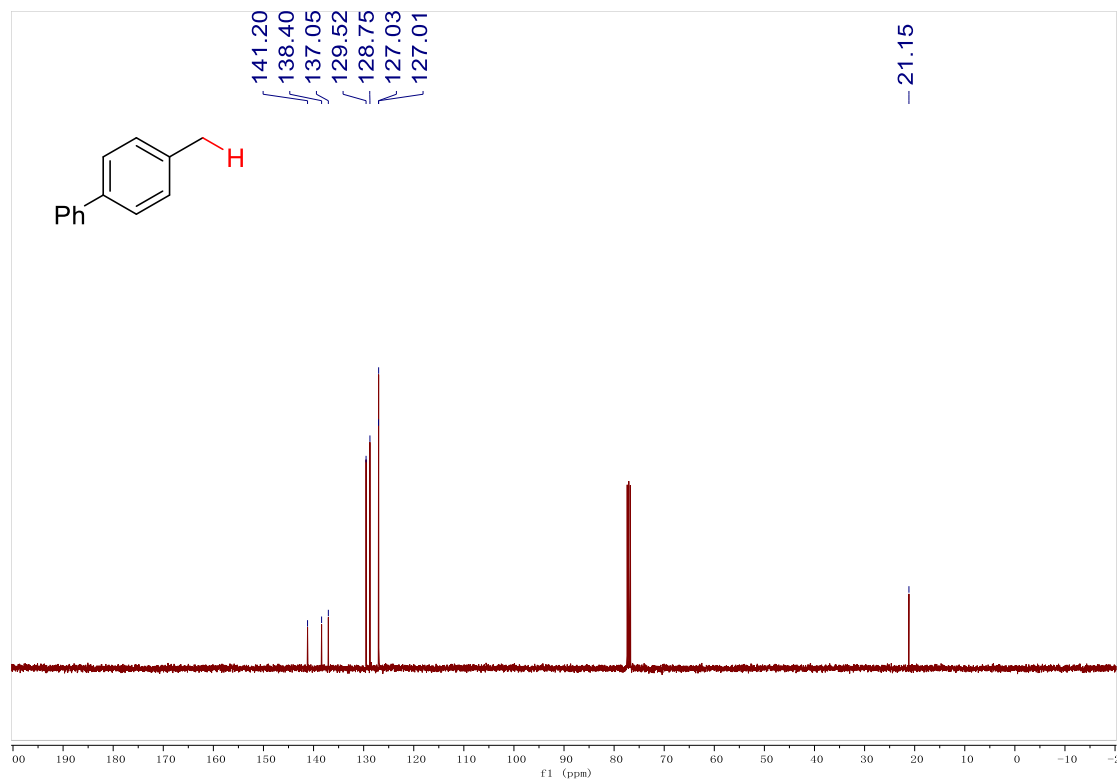

$^1\text{H}$  NMR (400 MHz,  $\text{CDCl}_3$ ) of **2b**

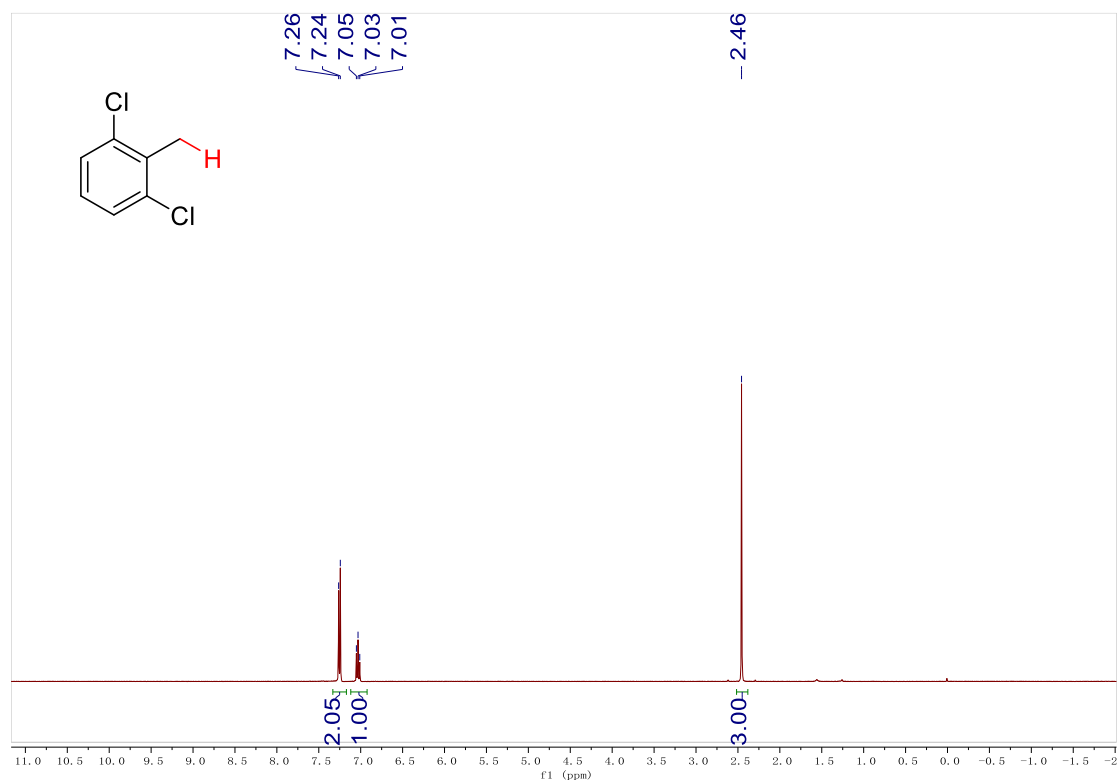

$^{13}\text{C}\{^1\text{H}\}$  NMR (101 MHz,  $\text{CDCl}_3$ ) of **2b**

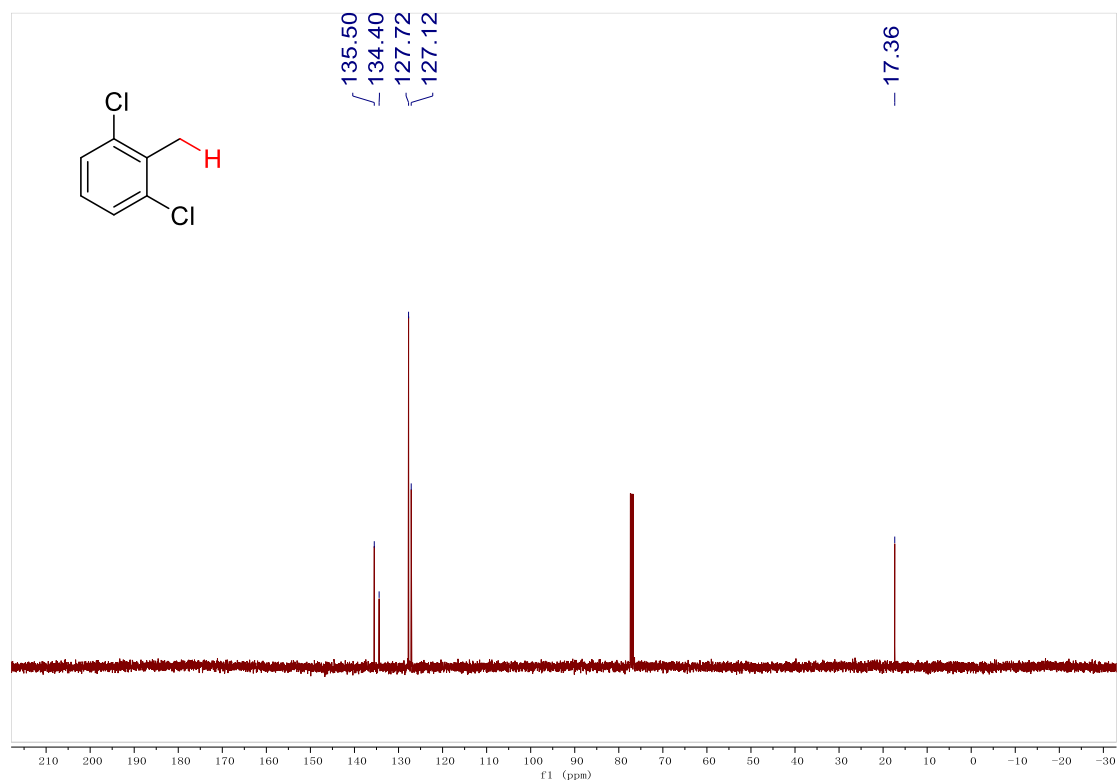

$^1\text{H}$  NMR (400 MHz,  $\text{CDCl}_3$ ) of **2c**

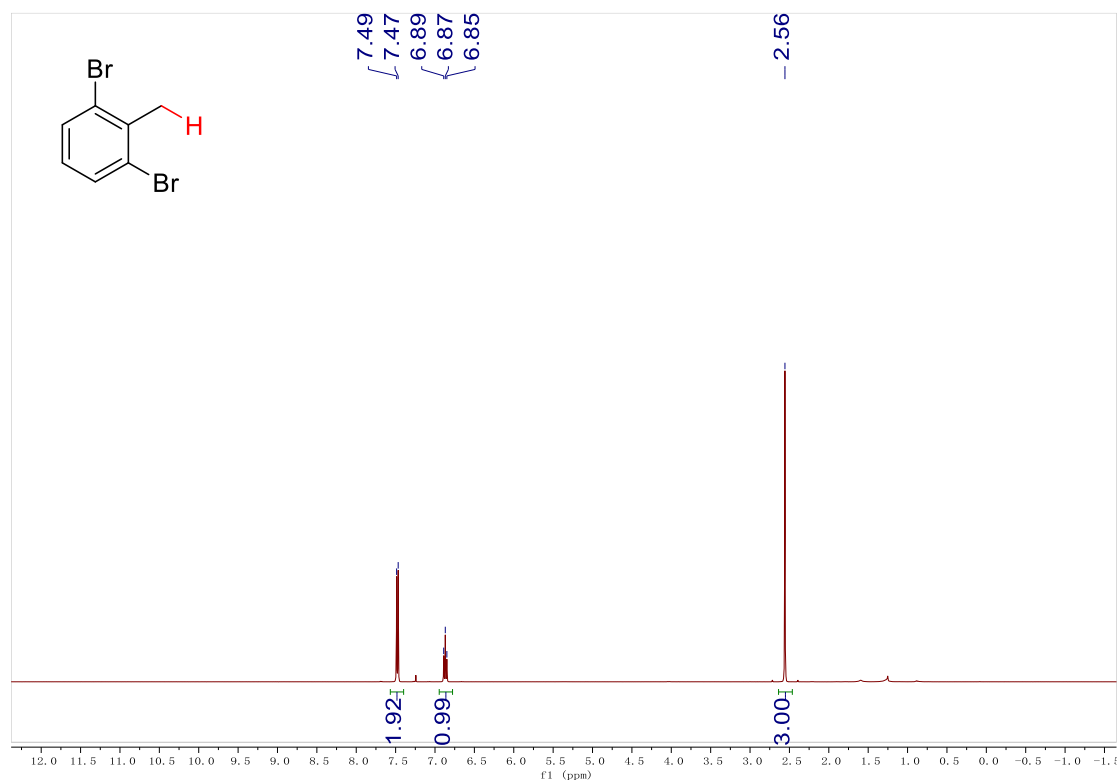

$^{13}\text{C}\{^1\text{H}\}$  NMR (101 MHz,  $\text{CDCl}_3$ ) of **2c**

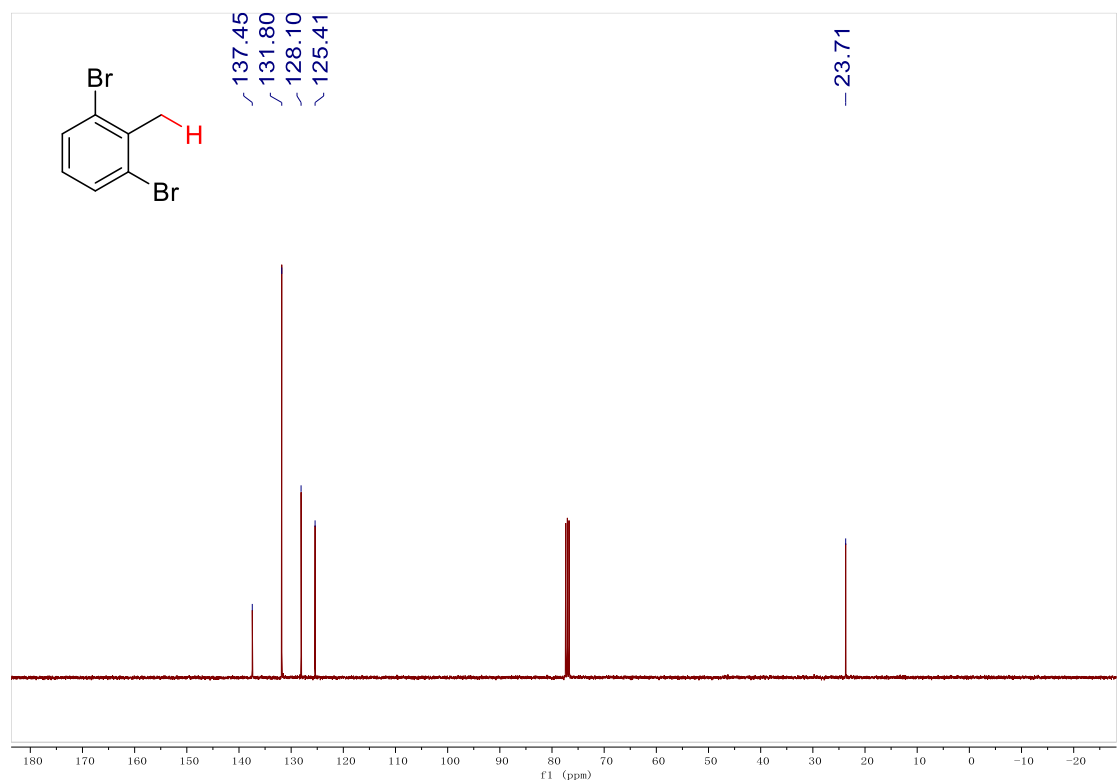

$^1\text{H}$  NMR (400 MHz,  $\text{CDCl}_3$ ) of **2d**

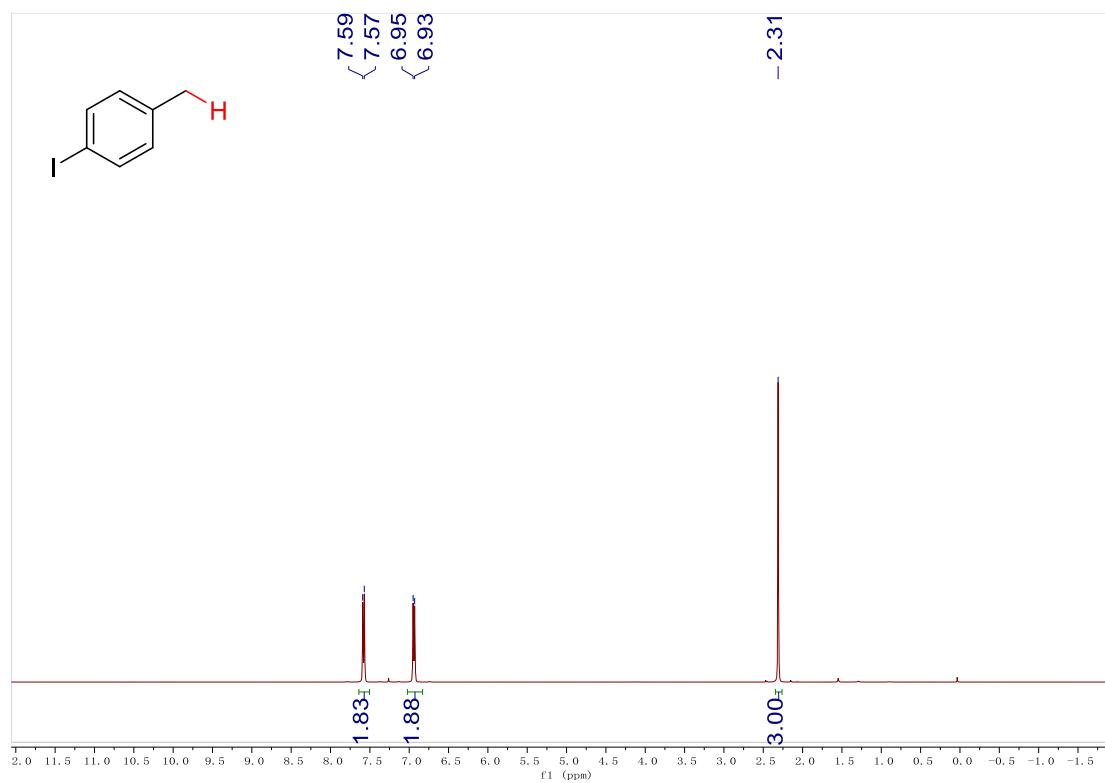

$^{13}\text{C}\{^1\text{H}\}$  NMR (101 MHz,  $\text{CDCl}_3$ ) of **2d**

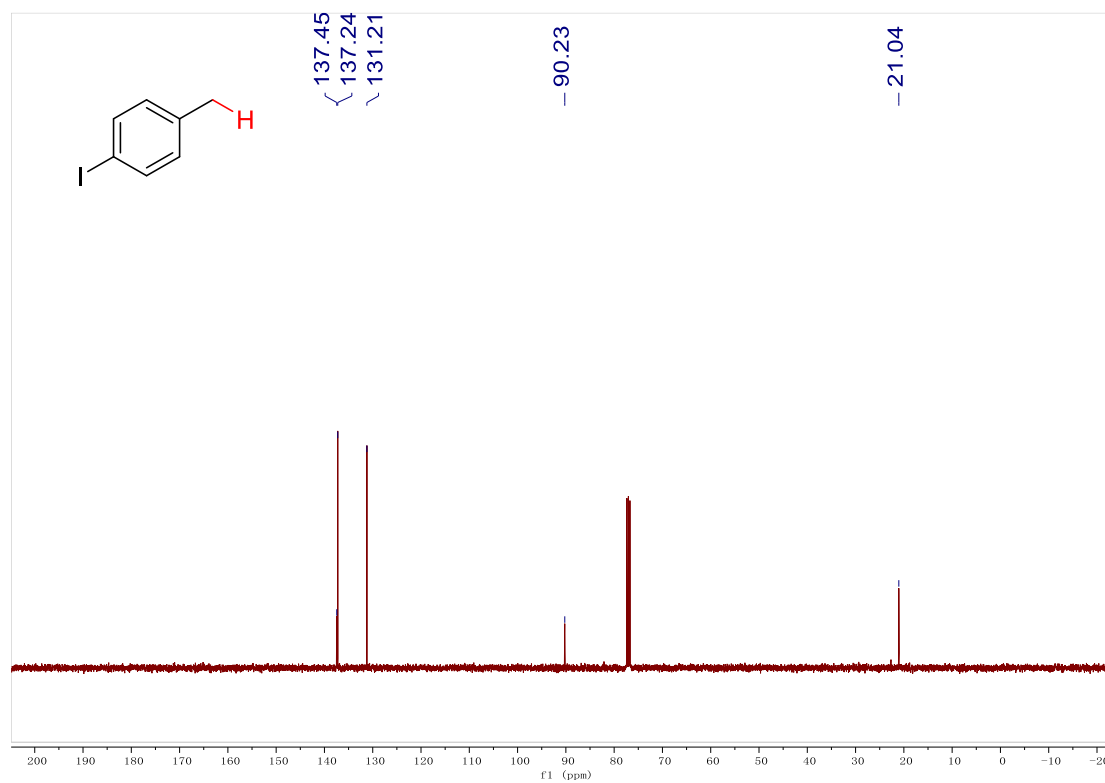

<sup>1</sup>H NMR (400 MHz, CDCl<sub>3</sub>) of **2e**

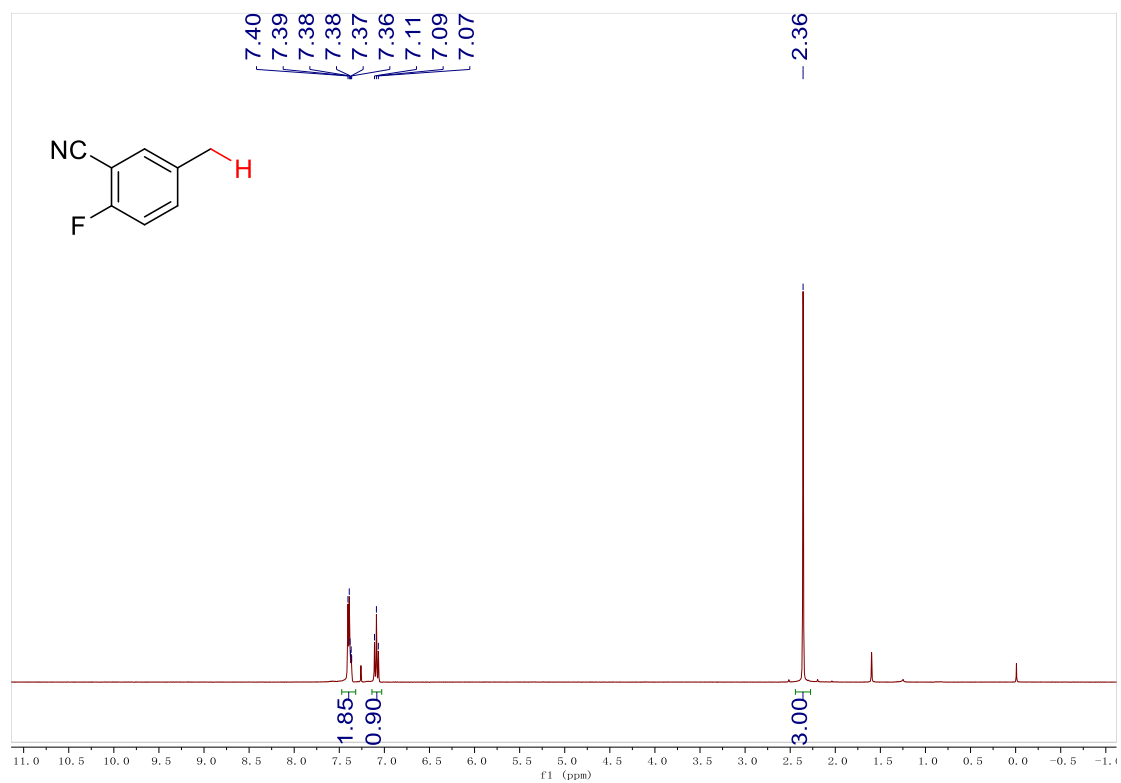

<sup>19</sup>F NMR (400 MHz, CDCl<sub>3</sub>) of **2e**

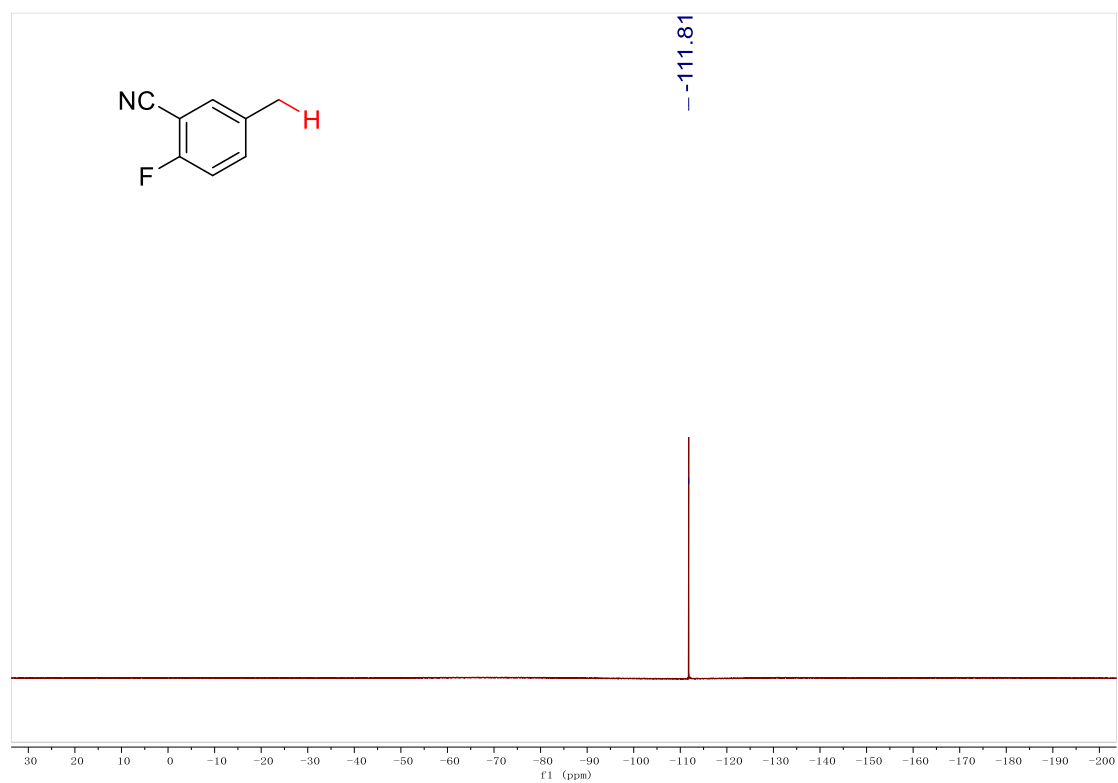

$^{13}\text{C}\{^1\text{H}\}$  NMR (101 MHz,  $\text{CDCl}_3$ ) of **2e**

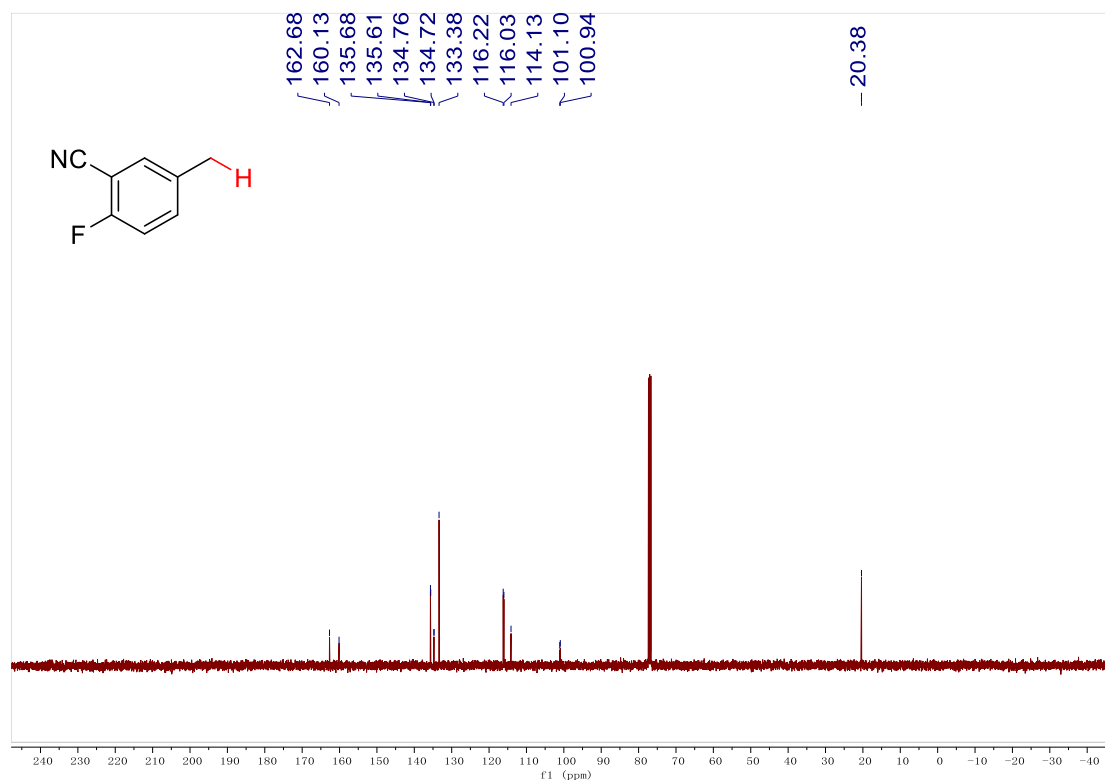

$^1\text{H}$  NMR (400 MHz,  $\text{CDCl}_3$ ) of **2f**

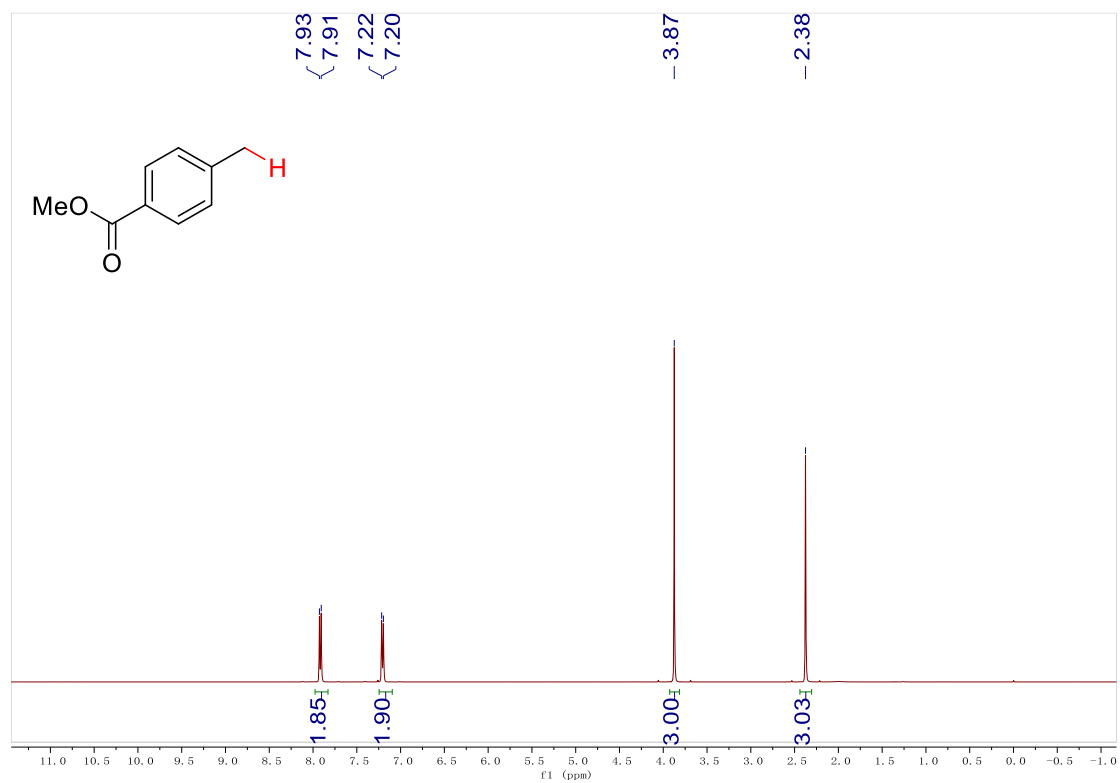

$^{13}\text{C}\{^1\text{H}\}$  NMR (101 MHz,  $\text{CDCl}_3$ ) of **2f**

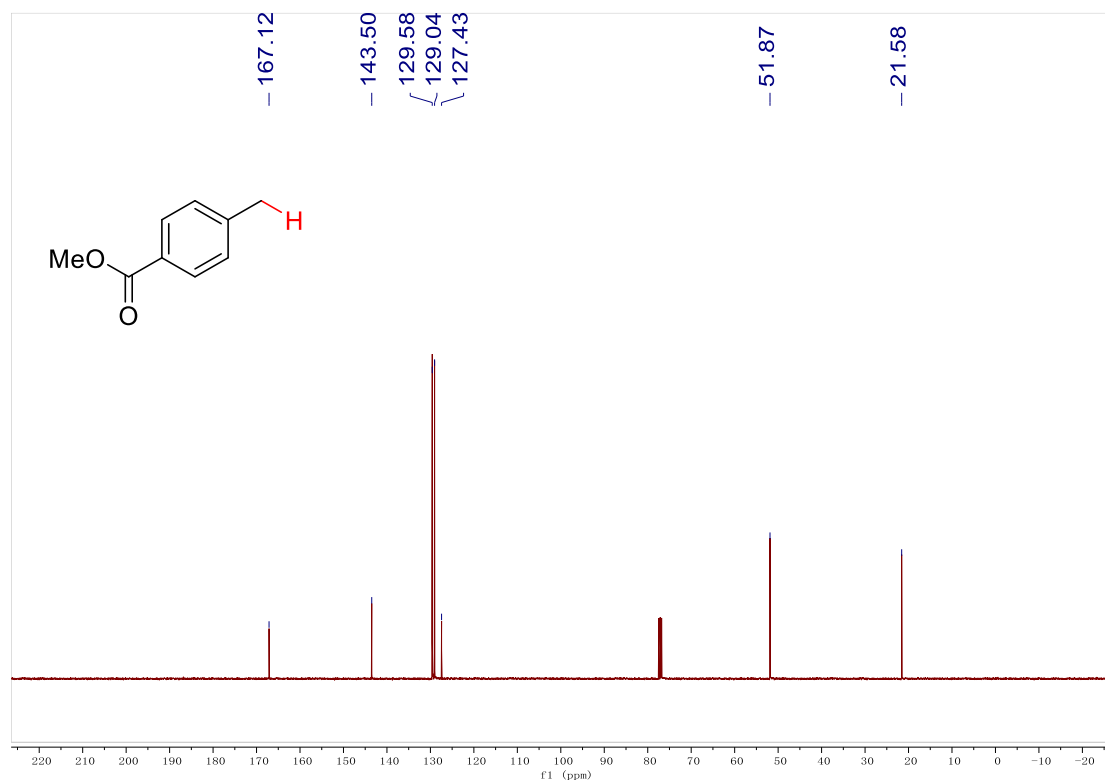

$^1\text{H}$  NMR (400 MHz,  $\text{CDCl}_3$ ) of **2g**

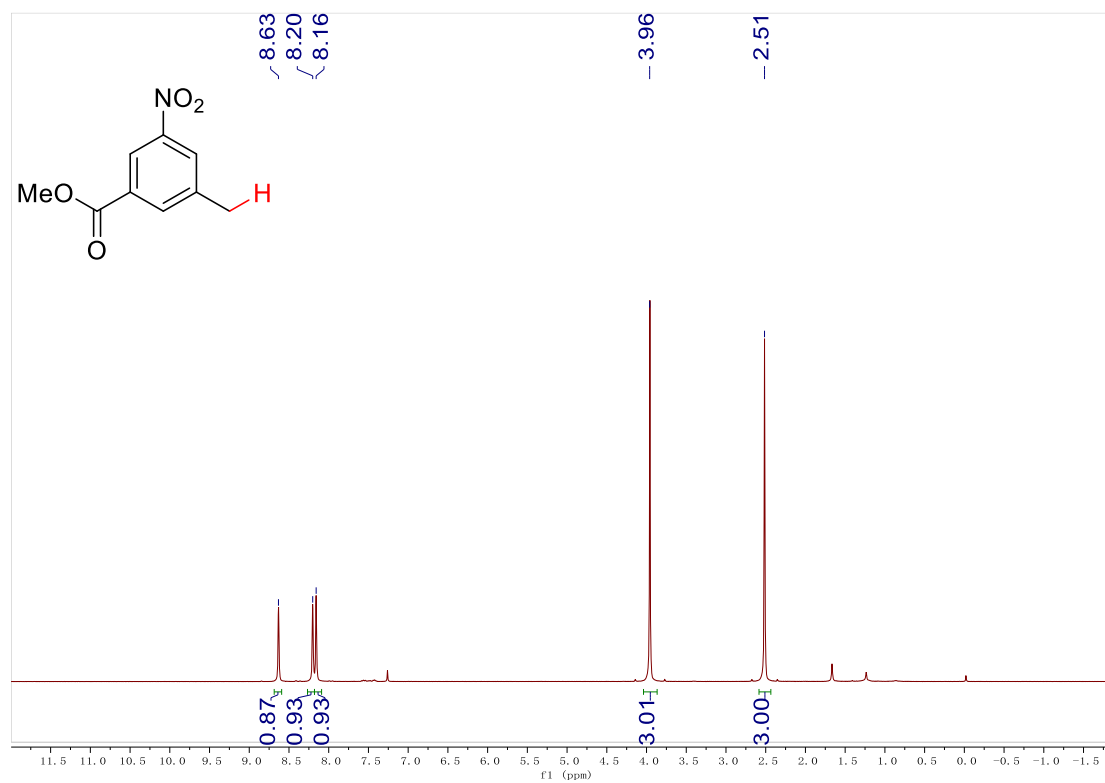



$^{13}\text{C}\{^1\text{H}\}$  NMR (101 MHz,  $\text{CDCl}_3$ ) of **2g**

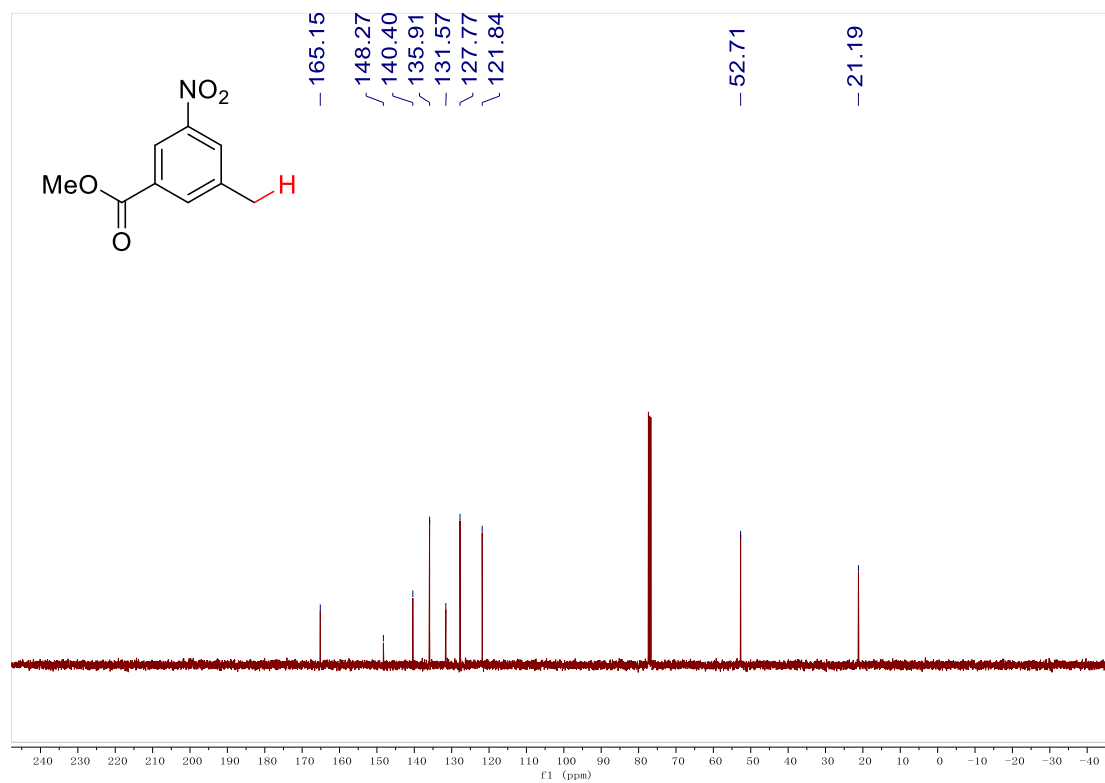

$^1\text{H}$  NMR (400 MHz,  $\text{CDCl}_3$ ) of **2h**

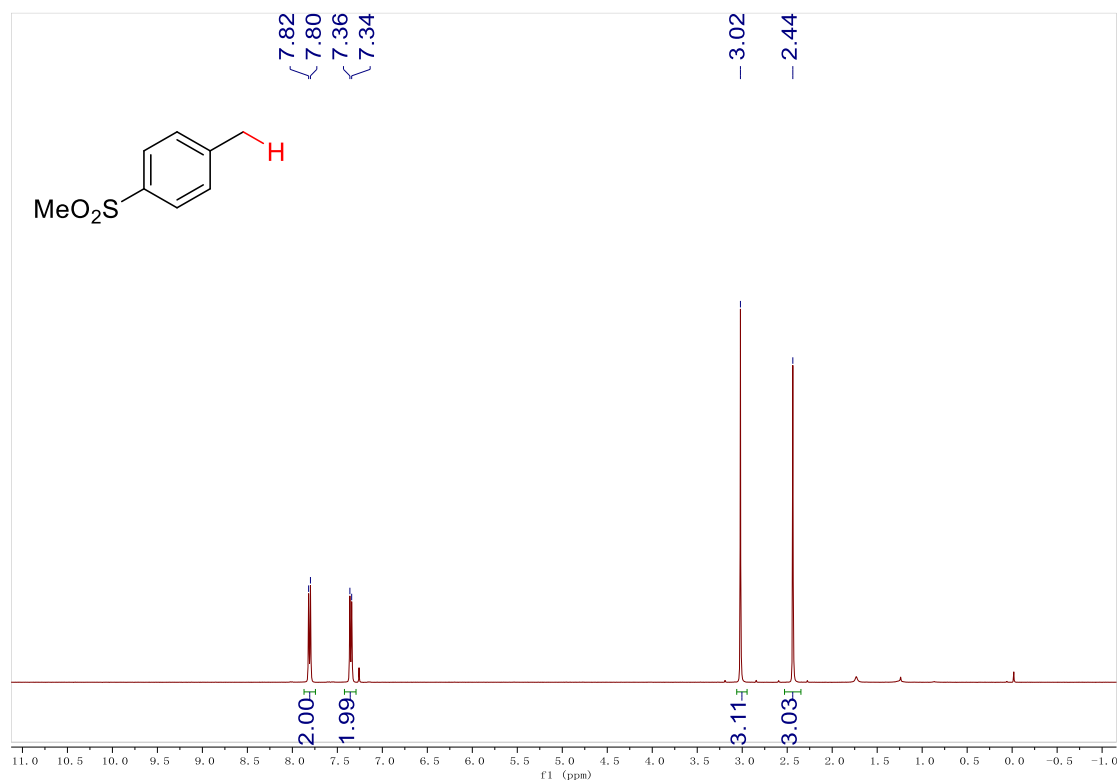

$^{13}\text{C}\{^1\text{H}\}$  NMR (101 MHz,  $\text{CDCl}_3$ ) of **2h**

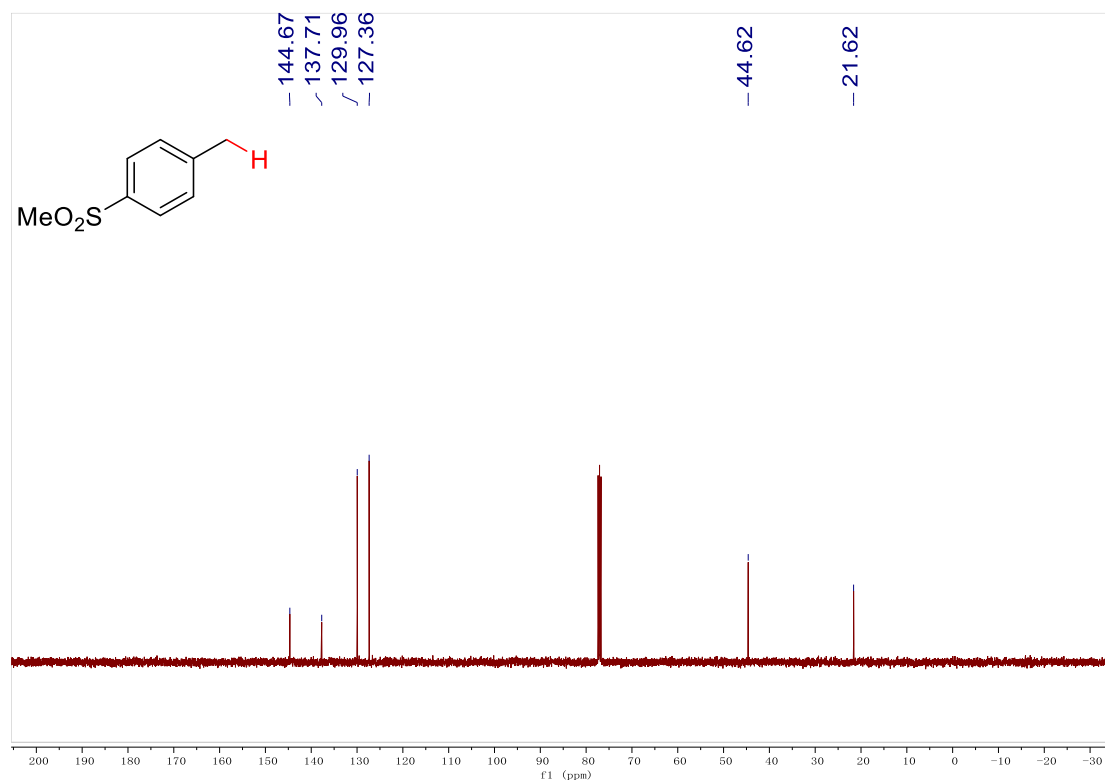

$^1\text{H}$  NMR (400 MHz,  $\text{CDCl}_3$ ) of **2i**

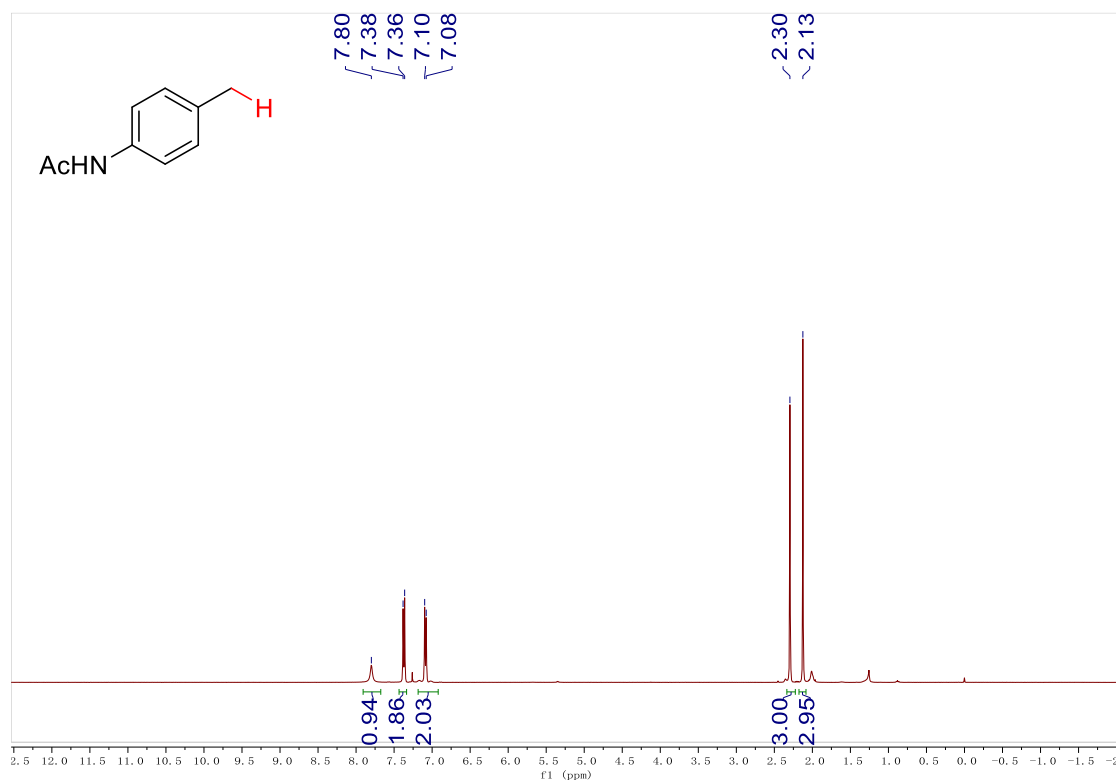

$^{13}\text{C}\{^1\text{H}\}$  NMR (101 MHz,  $\text{CDCl}_3$ ) of **2i**

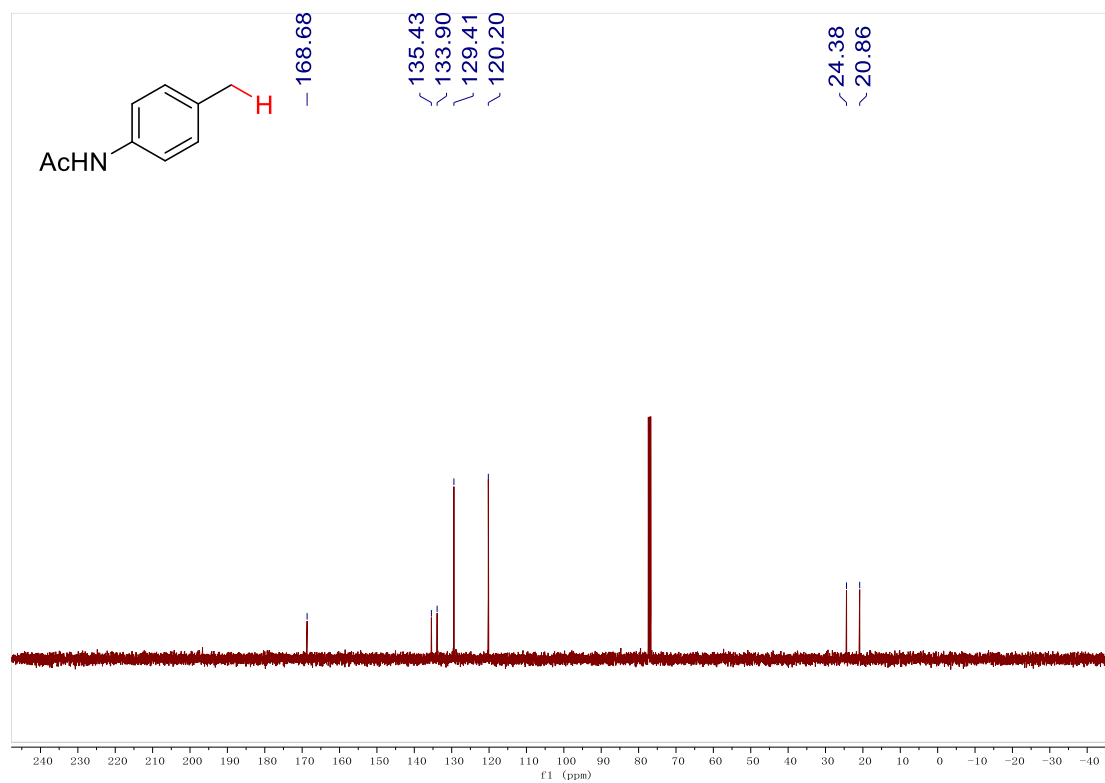

$^1\text{H}$  NMR (400 MHz,  $\text{CDCl}_3$ ) of **2j**

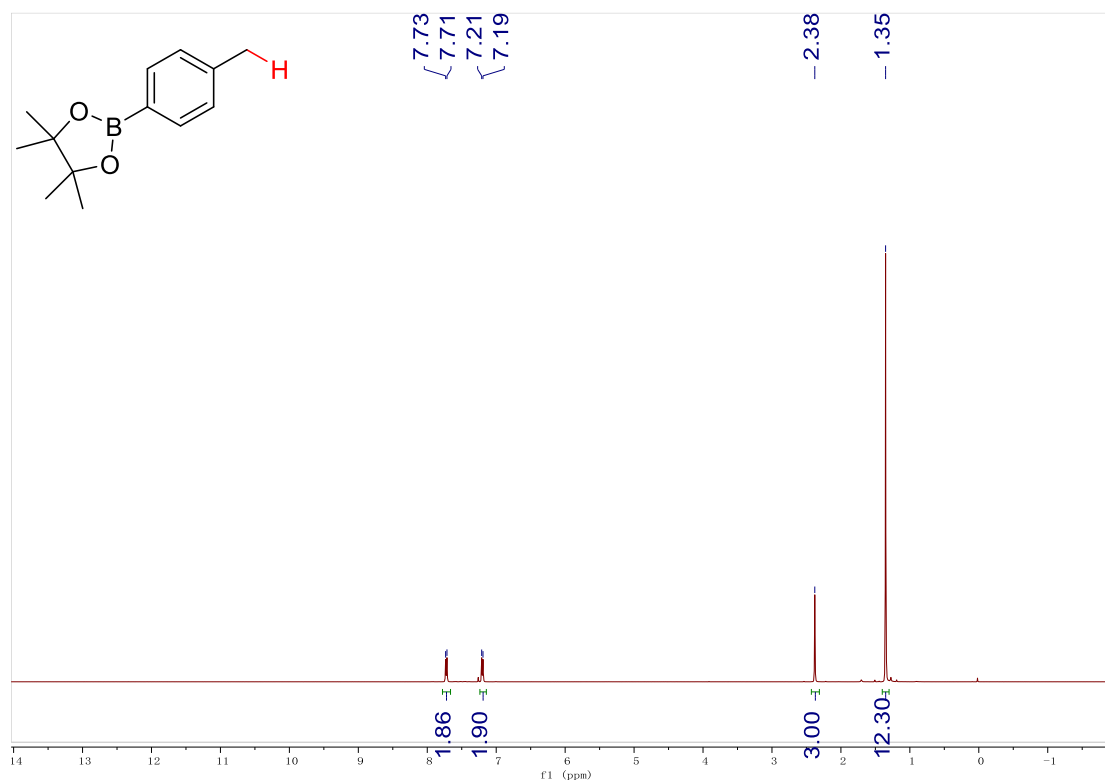

$^{13}\text{C}\{^1\text{H}\}$  NMR (101 MHz,  $\text{CDCl}_3$ ) of **2j**

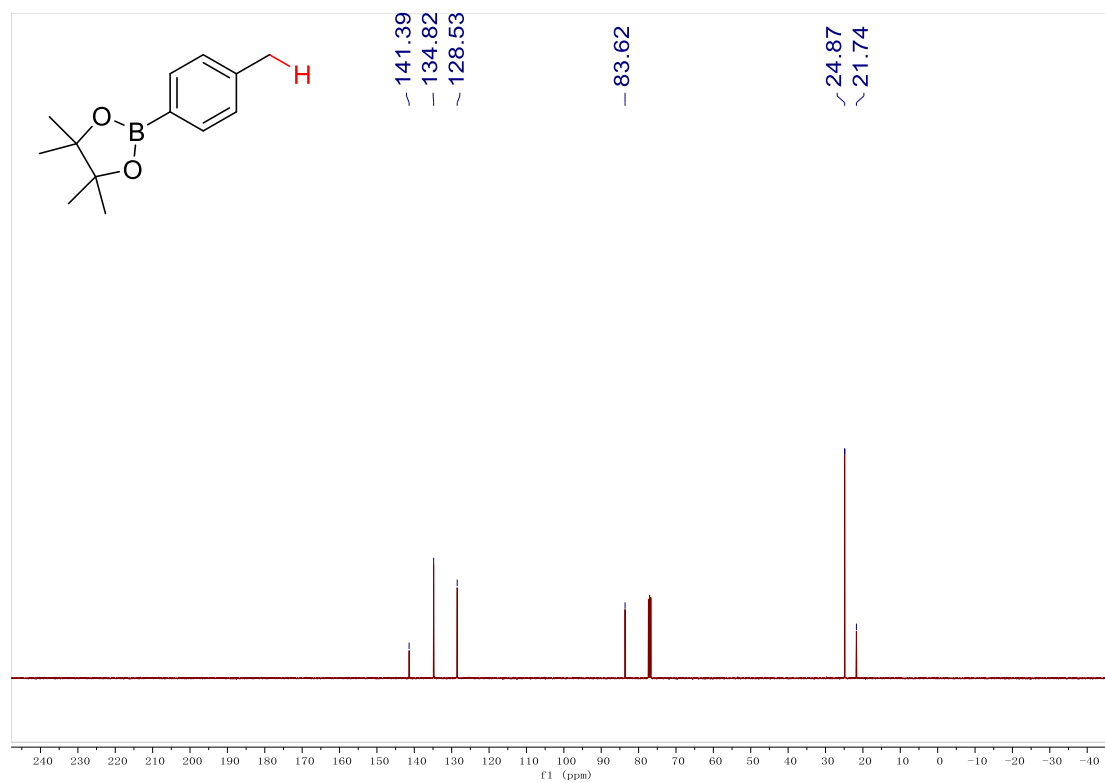

$^1\text{H}$  NMR (400 MHz,  $\text{CDCl}_3$ ) of **2k**

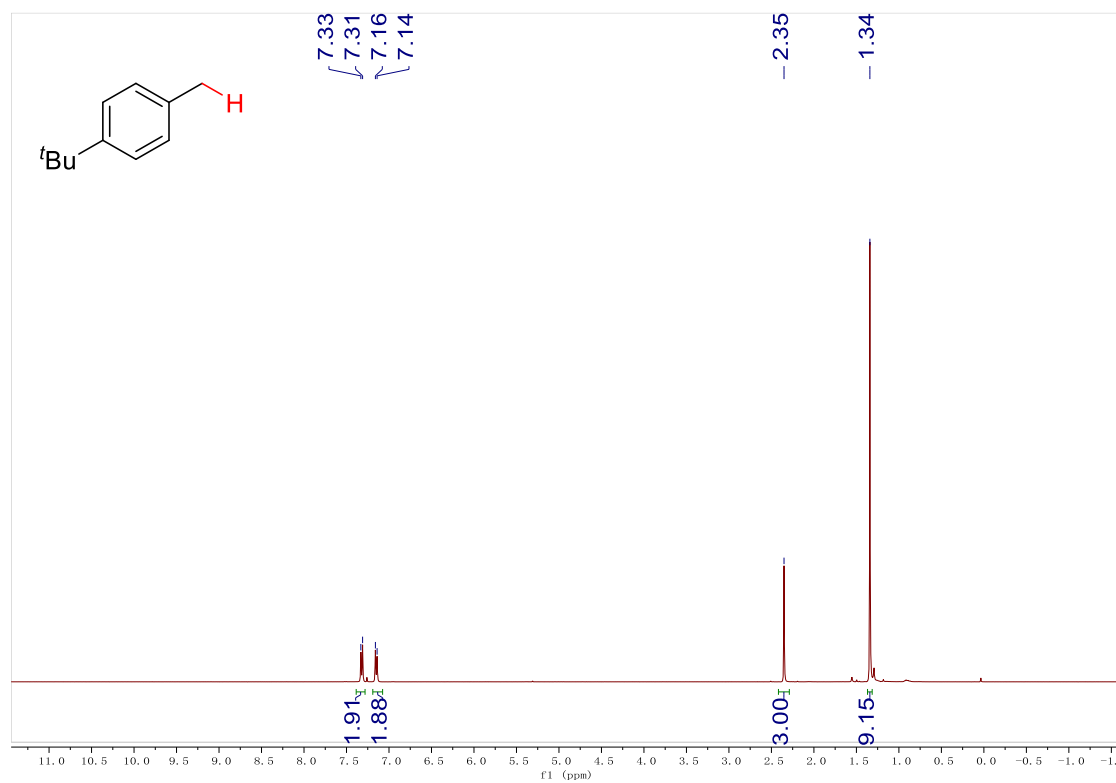

$^{13}\text{C}\{^1\text{H}\}$  NMR (101 MHz,  $\text{CDCl}_3$ ) of **2k**

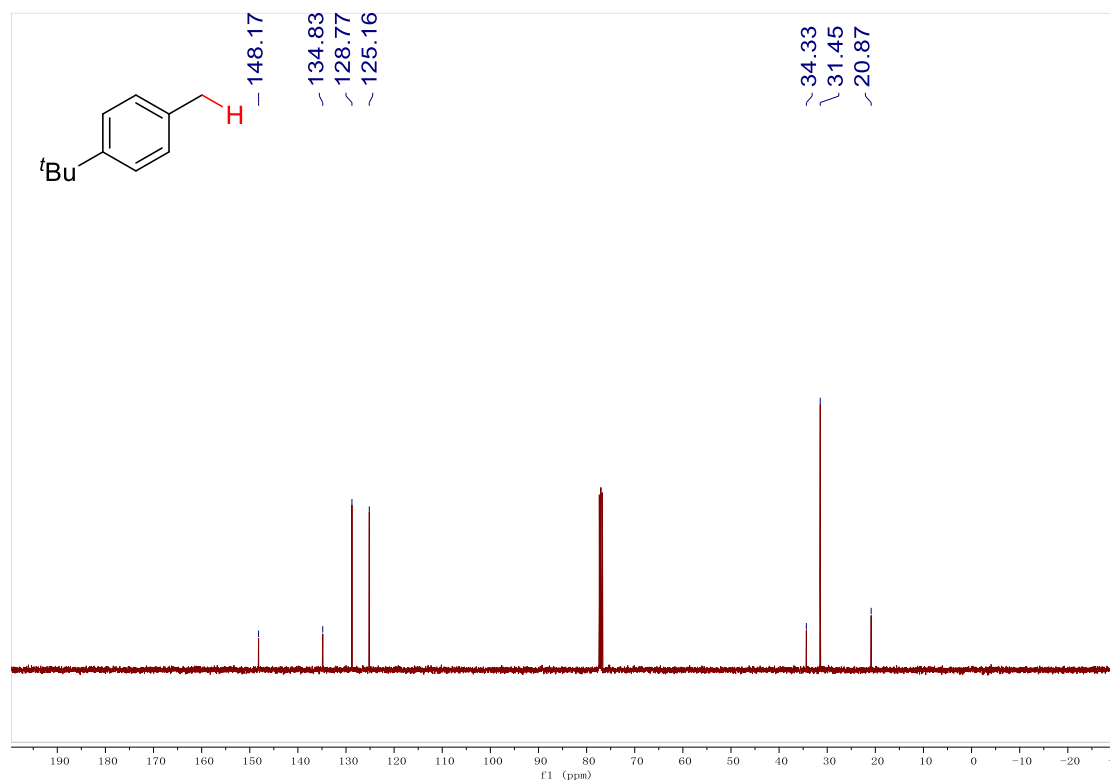

$^1\text{H}$  NMR (400 MHz,  $\text{CDCl}_3$ ) of **2l**

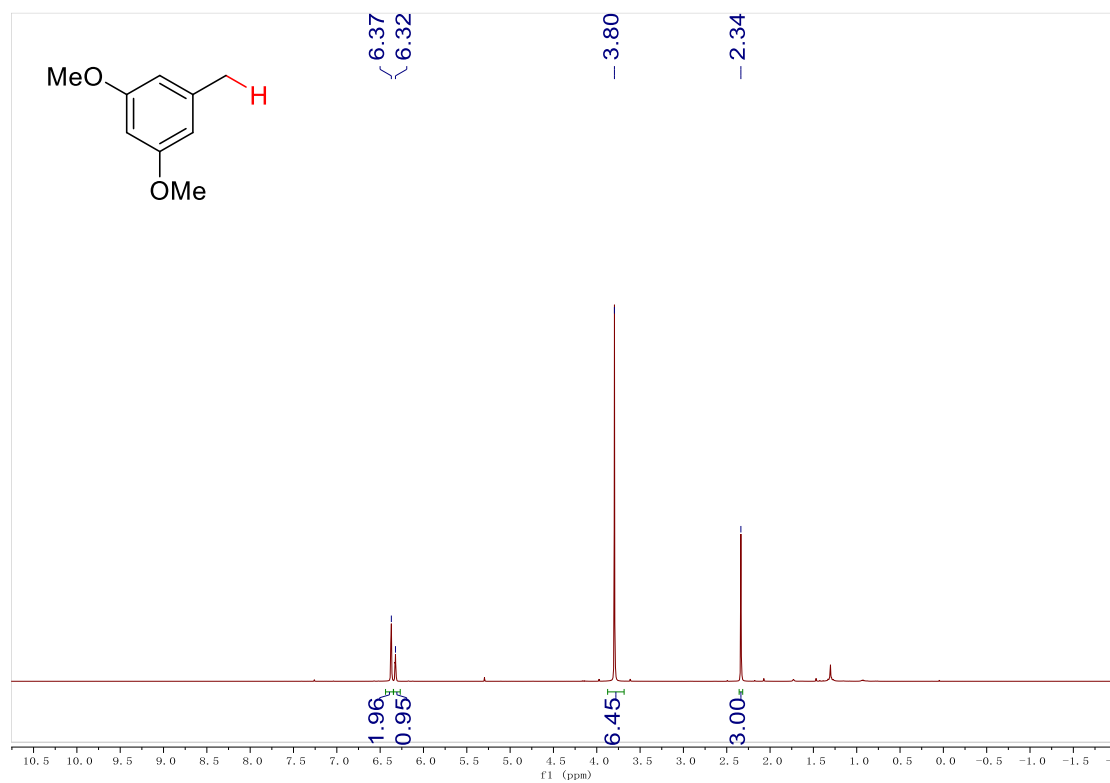

$^{13}\text{C}\{^1\text{H}\}$  NMR (101 MHz,  $\text{CDCl}_3$ ) of **2l**

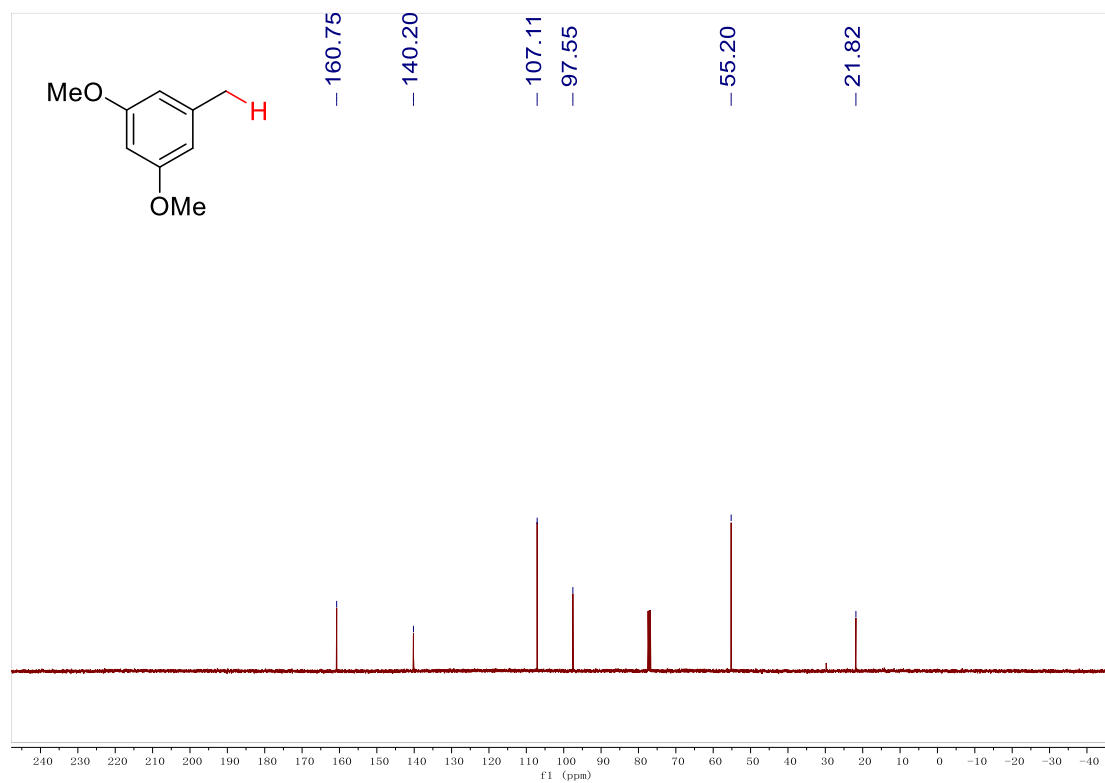

$^1\text{H}$  NMR (400 MHz,  $\text{CDCl}_3$ ) of **2m**

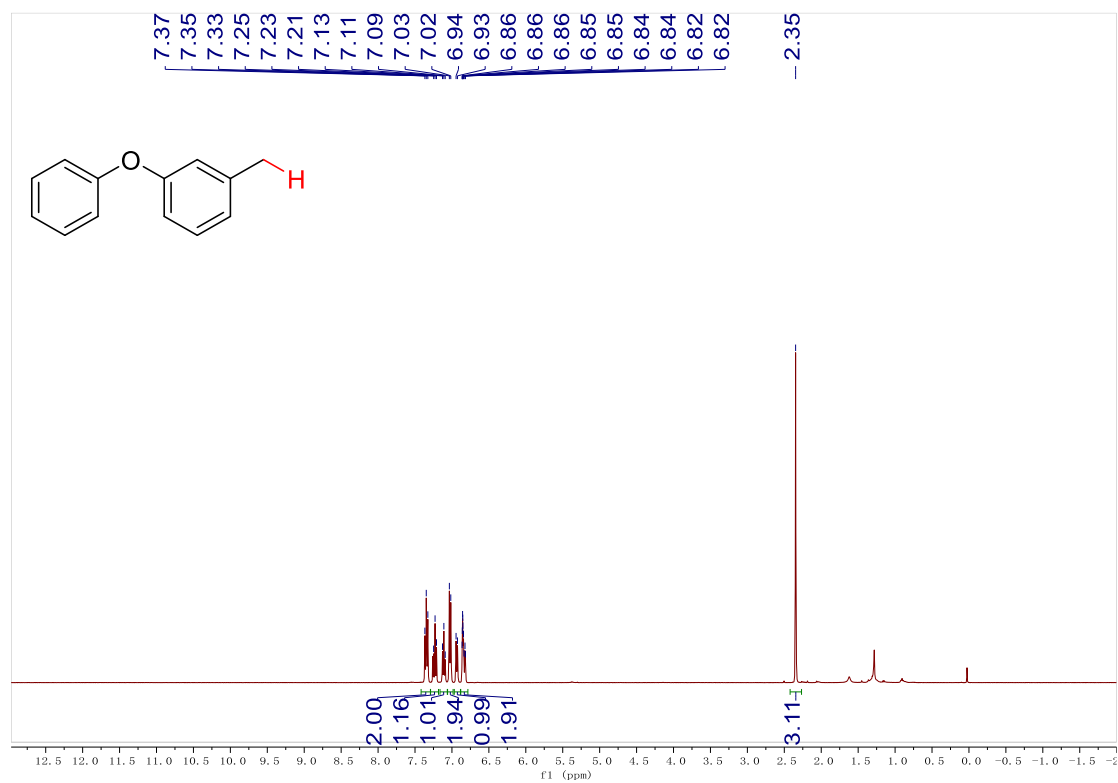

$^{13}\text{C}\{^1\text{H}\}$  NMR (101 MHz,  $\text{CDCl}_3$ ) of **2m**

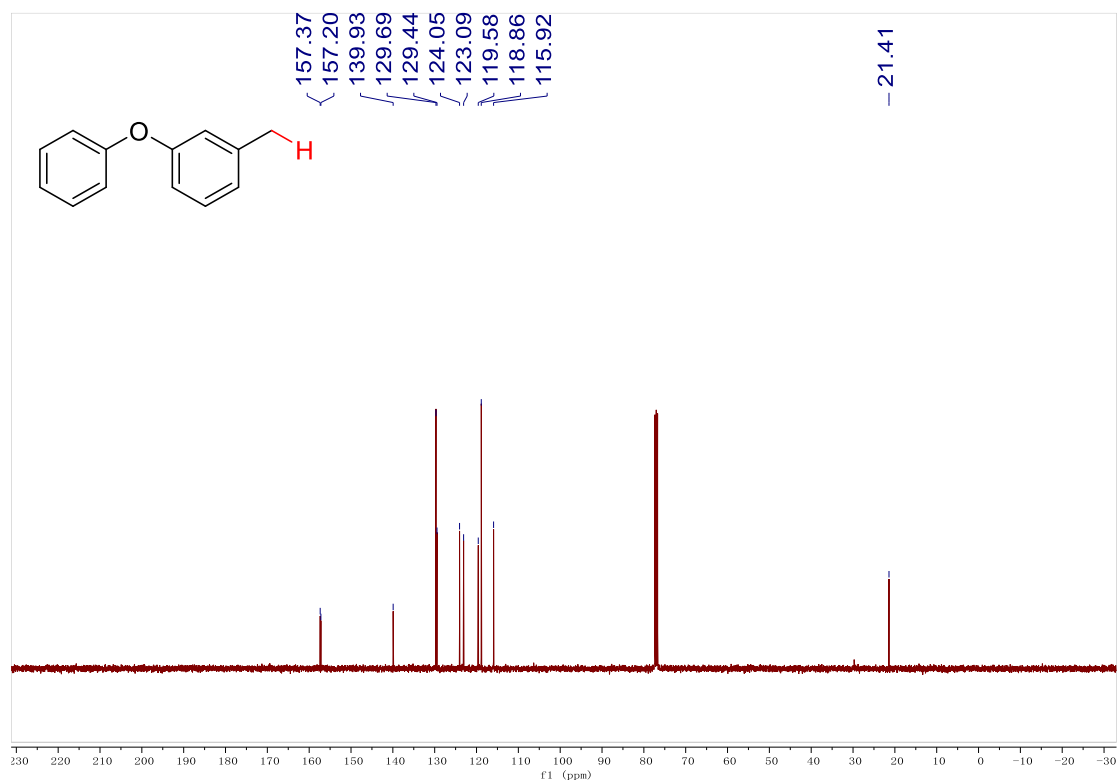

$^1\text{H}$  NMR (400 MHz,  $\text{CDCl}_3$ ) of **2n**

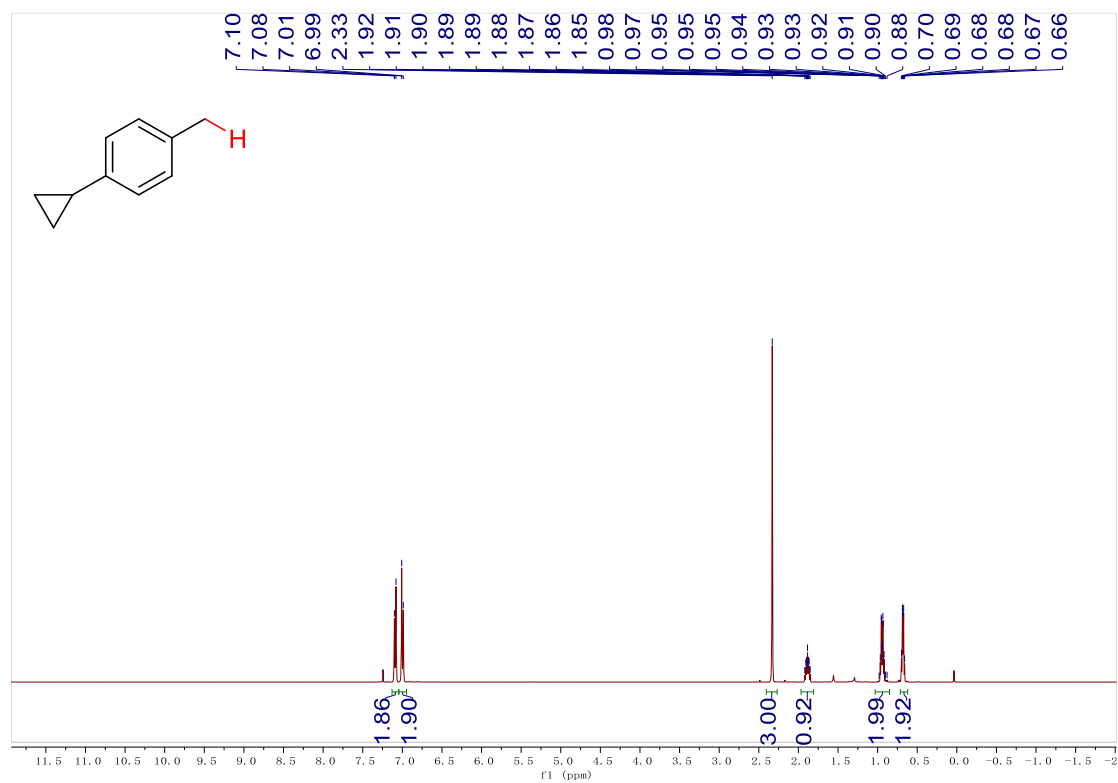

$^{13}\text{C}\{^1\text{H}\}$  NMR (101 MHz,  $\text{CDCl}_3$ ) of **2n**

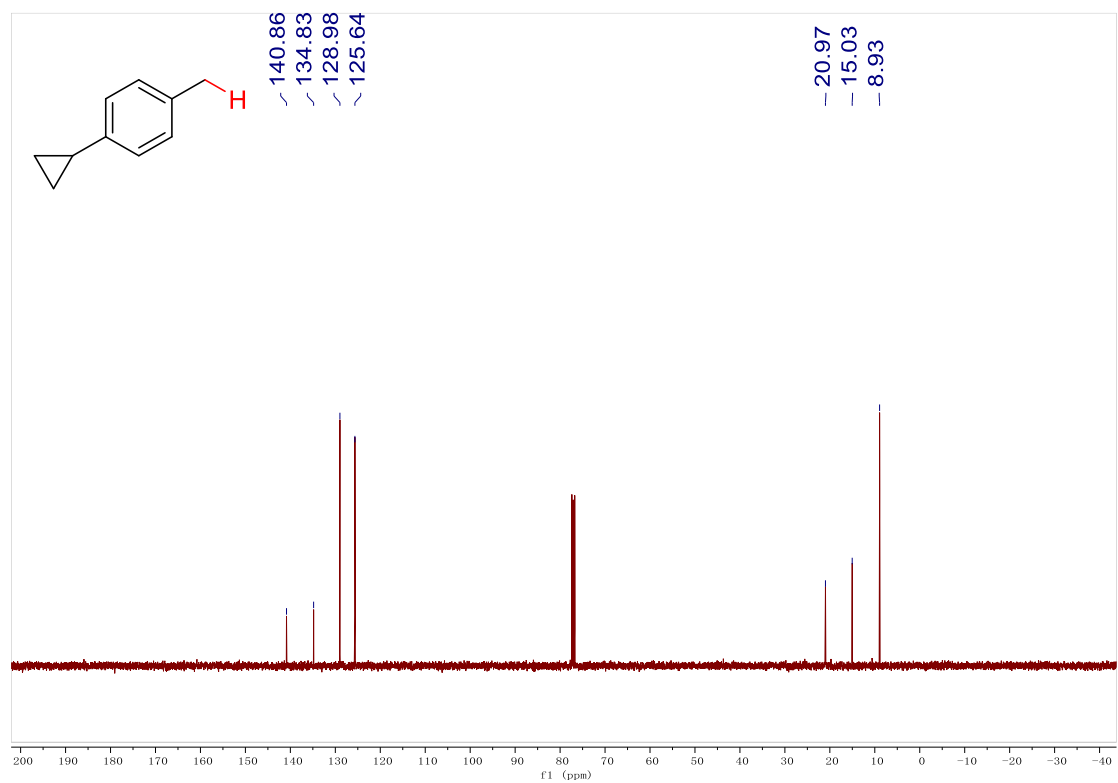

$^1\text{H}$  NMR (400 MHz,  $\text{CDCl}_3$ ) of **2o**

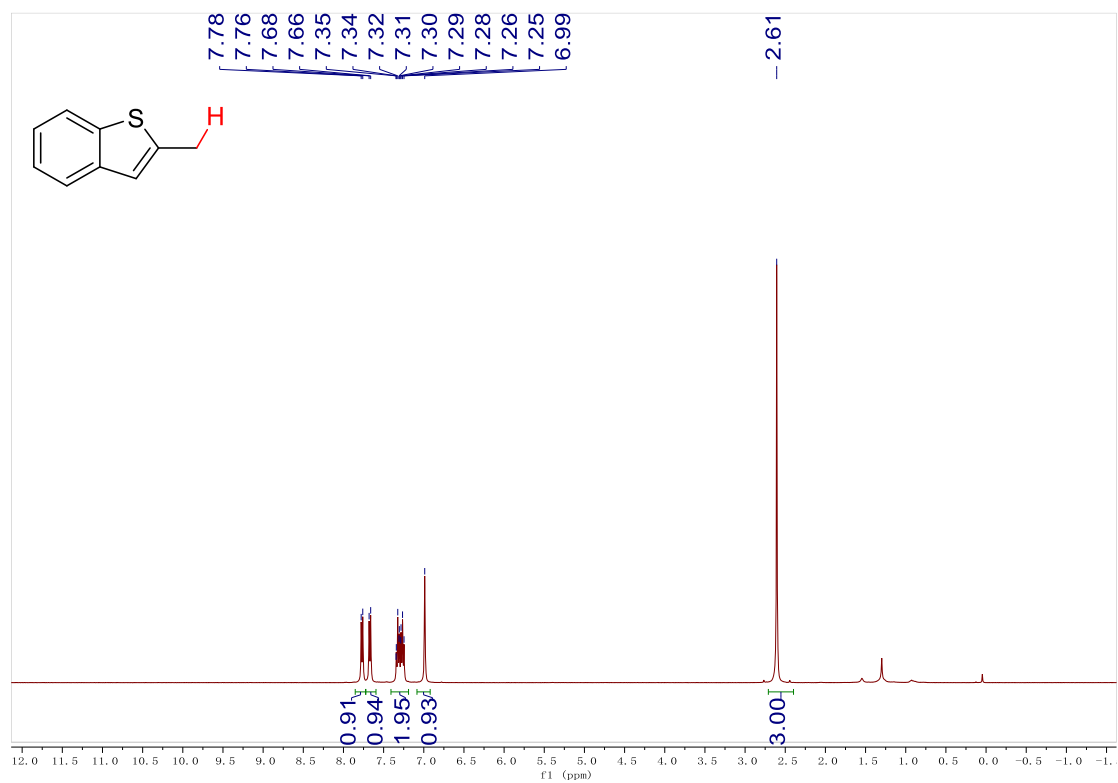



$^{13}\text{C}\{^1\text{H}\}$  NMR (101 MHz,  $\text{CDCl}_3$ ) of **2o**

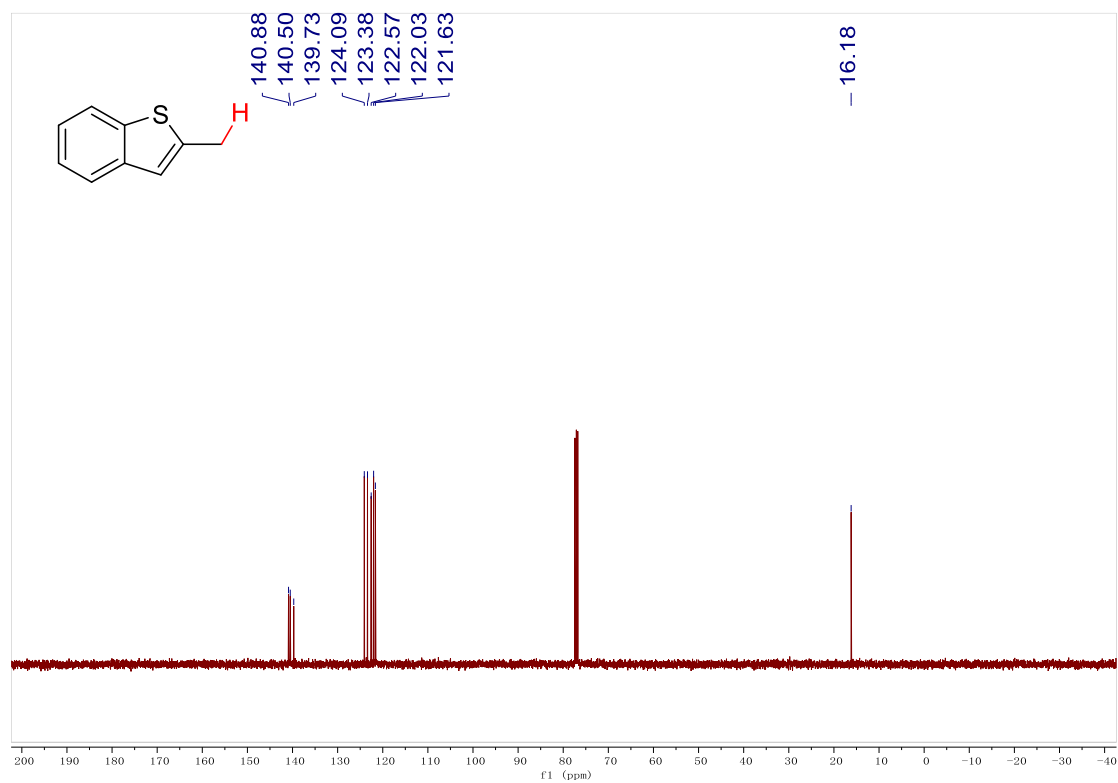

$^1\text{H}$  NMR (400 MHz,  $\text{CDCl}_3$ ) of **2p**

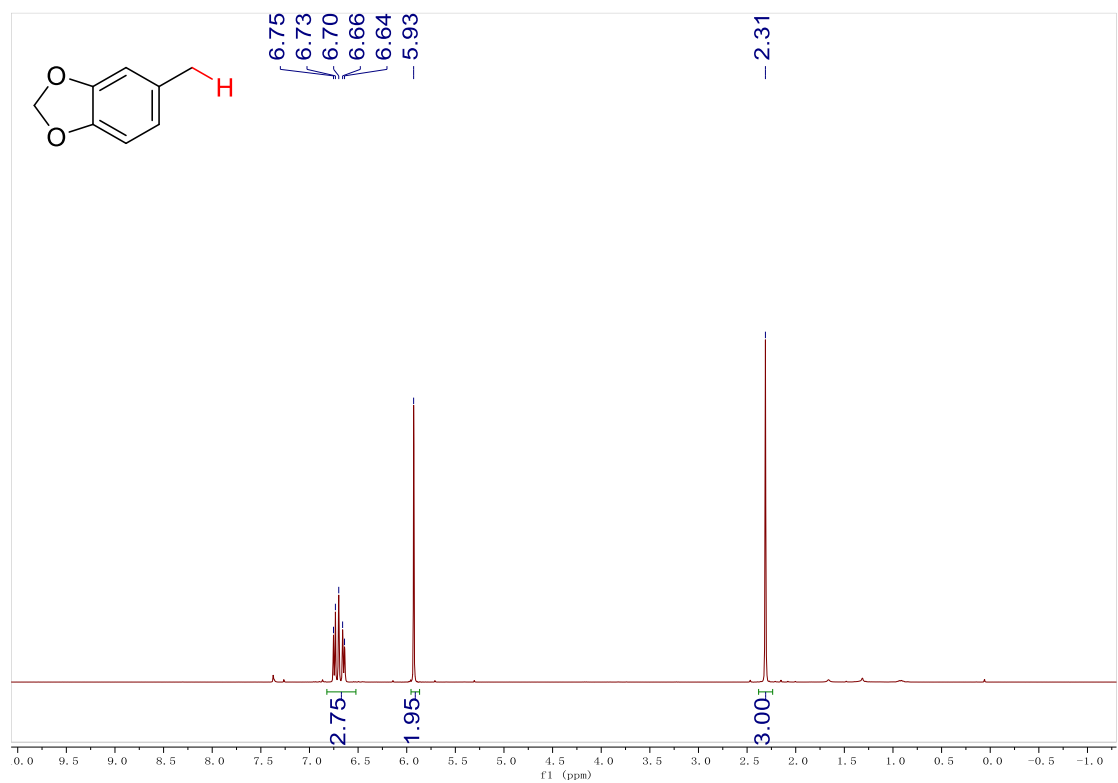

$^{13}\text{C}\{^1\text{H}\}$  NMR (101 MHz,  $\text{CDCl}_3$ ) of **2p**

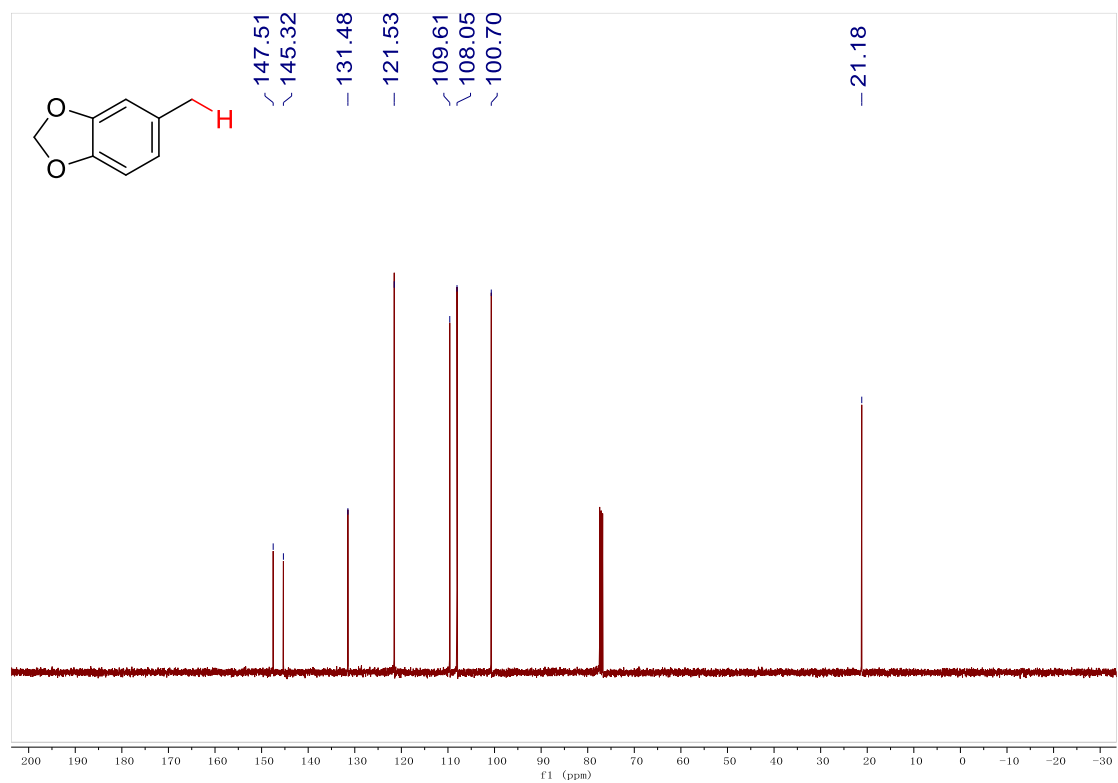

$^1\text{H}$  NMR (400 MHz,  $\text{CDCl}_3$ ) of **2q**

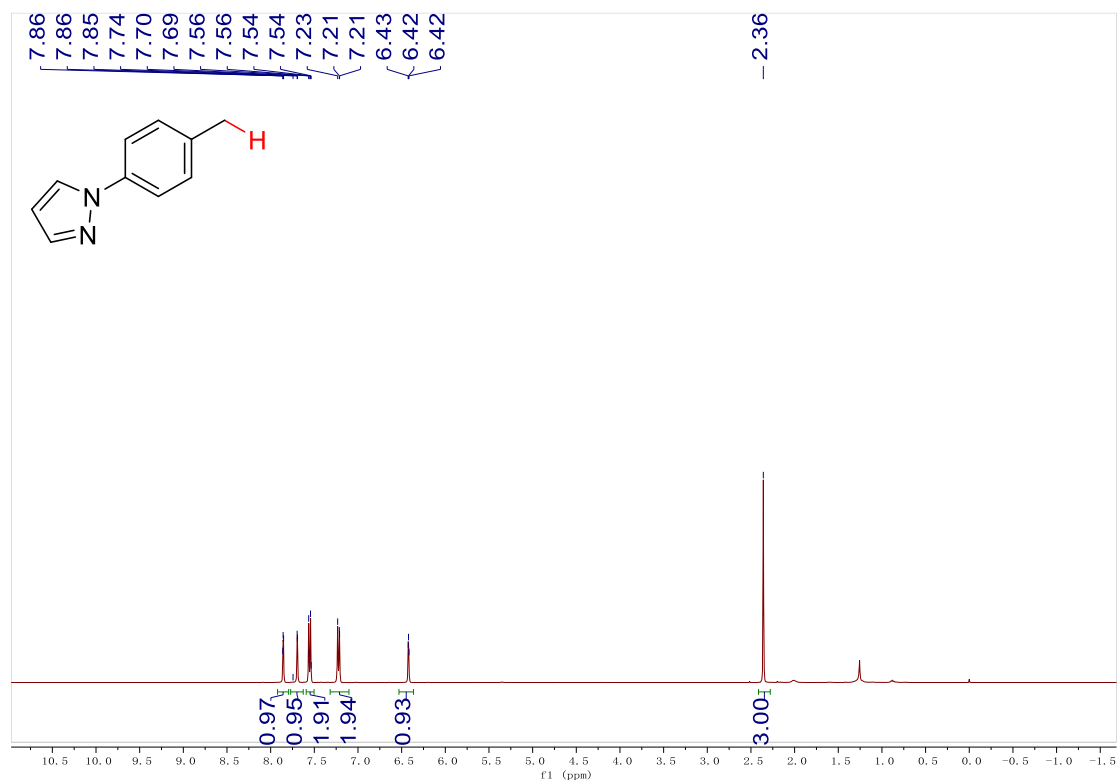

$^{13}\text{C}\{^1\text{H}\}$  NMR (101 MHz,  $\text{CDCl}_3$ ) of **2q**

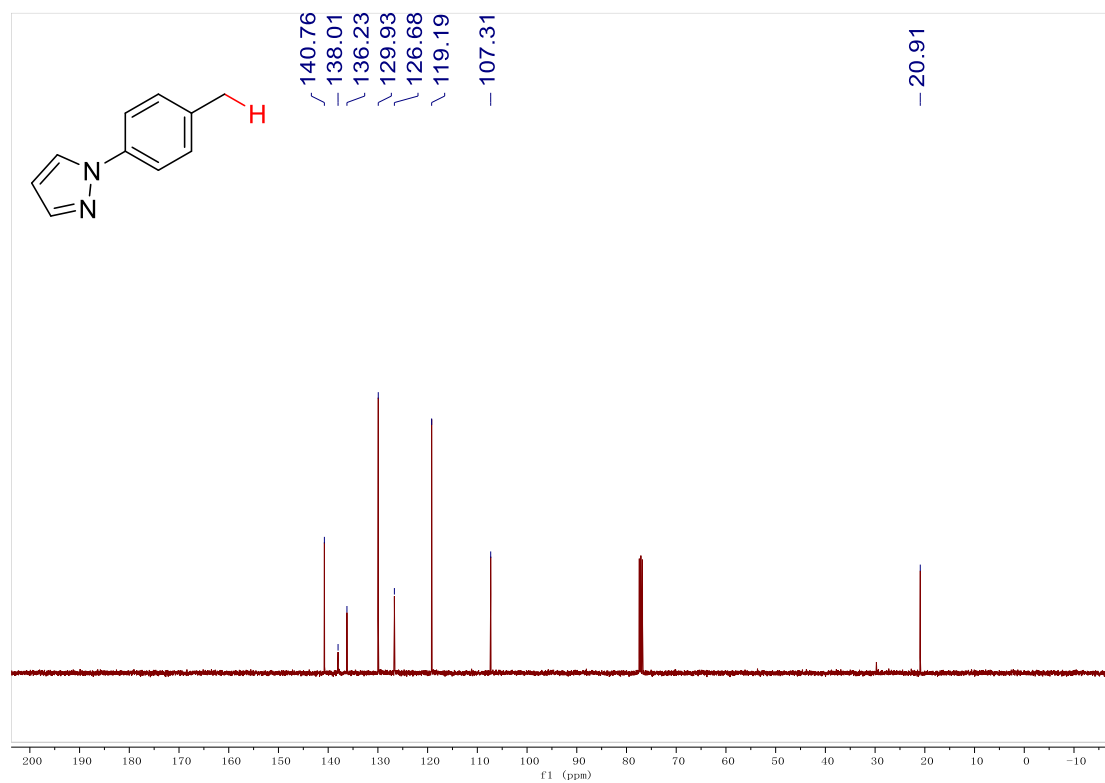

$^1\text{H}$  NMR (400 MHz,  $\text{CDCl}_3$ ) of **2r**

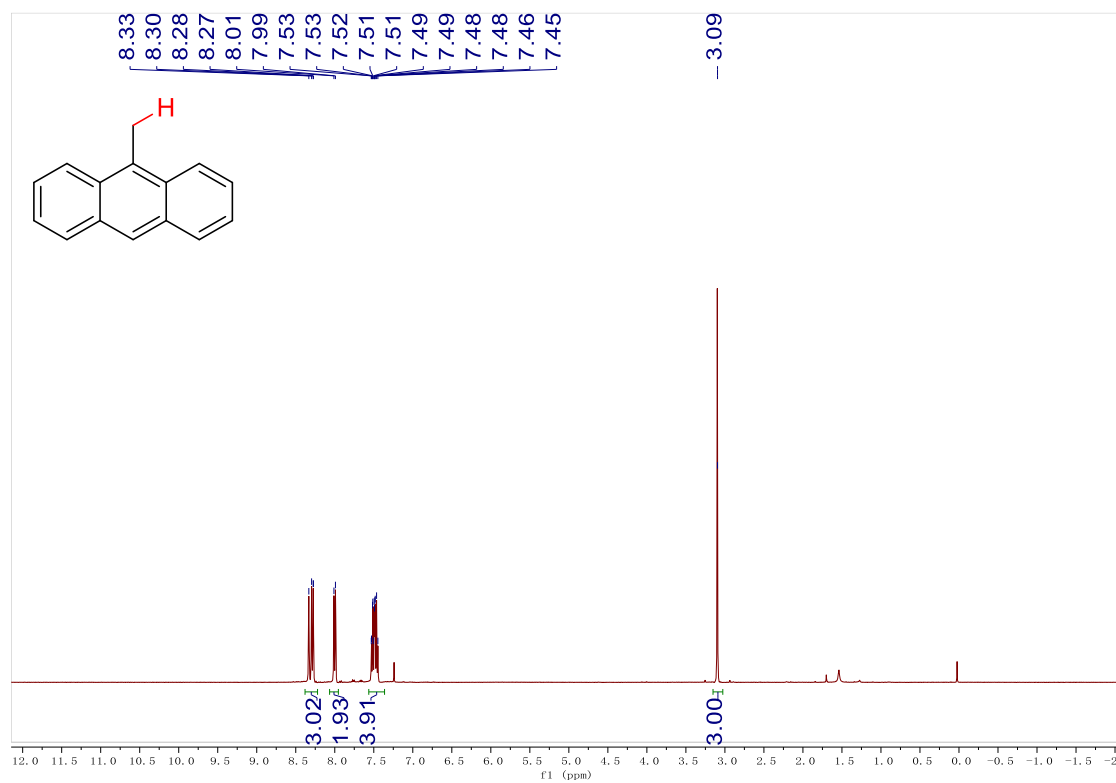

$^{13}\text{C}\{^1\text{H}\}$  NMR (101 MHz,  $\text{CDCl}_3$ ) of **2r**

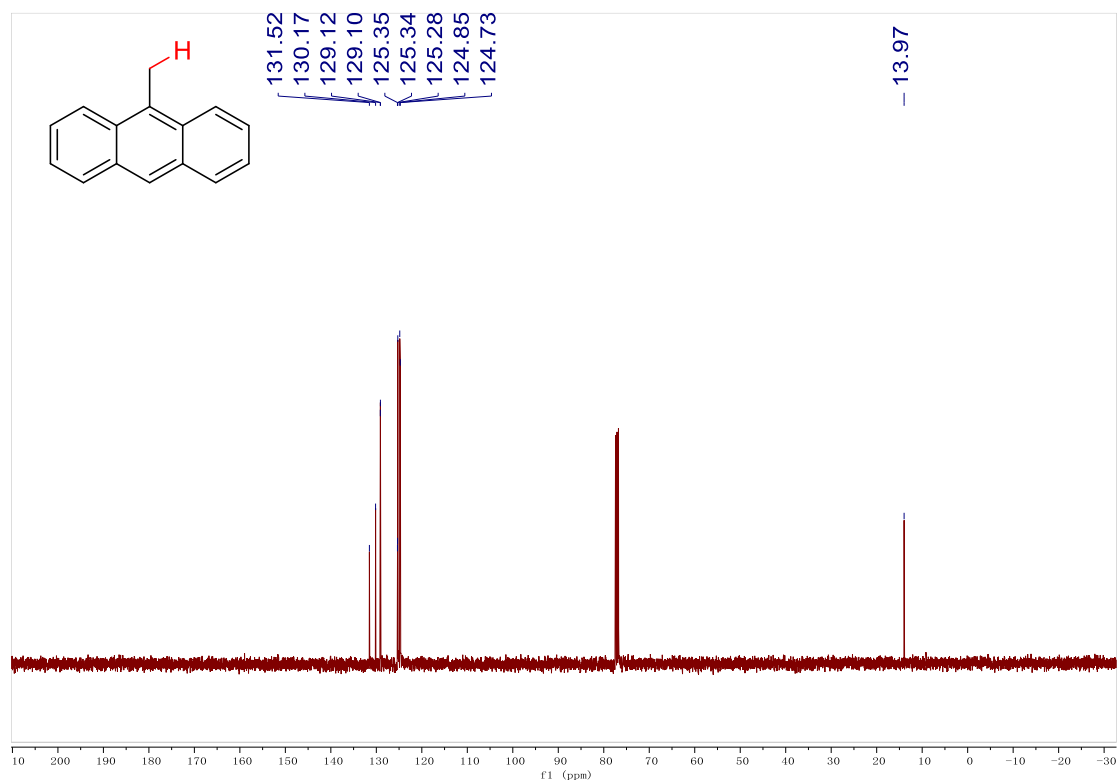

$^1\text{H}$  NMR (400 MHz,  $\text{CDCl}_3$ ) of **2s**

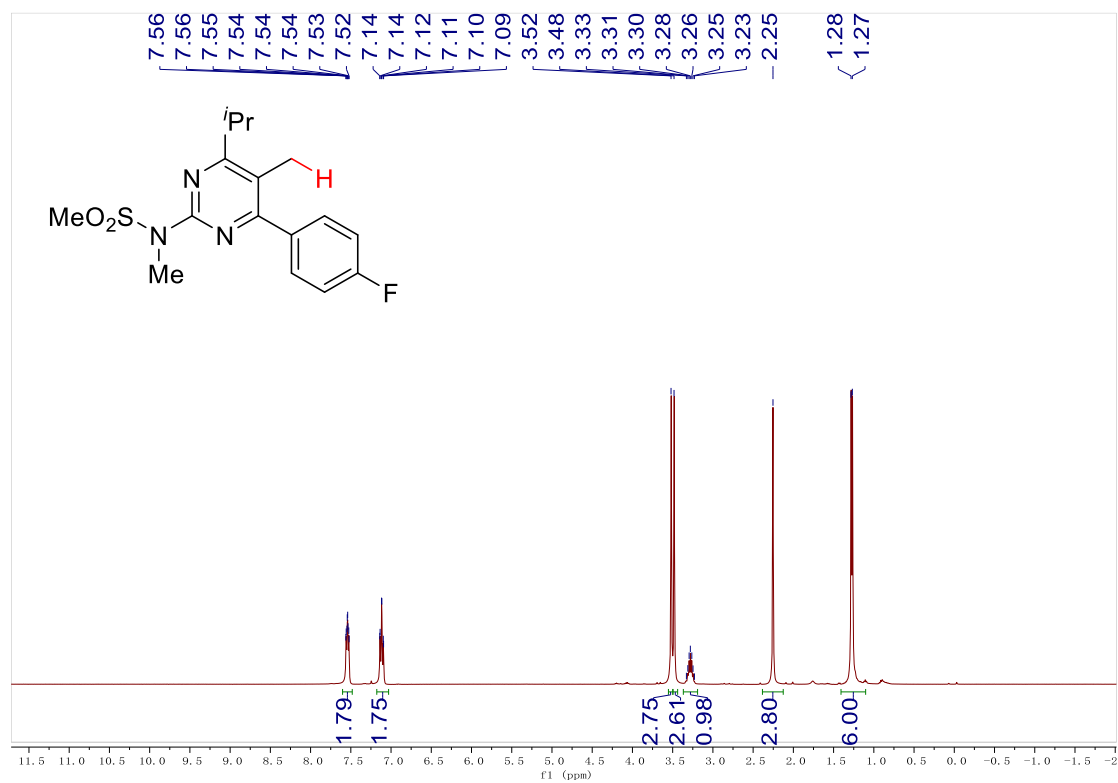

$^{19}\text{F}$  NMR (400 MHz,  $\text{CDCl}_3$ ) of **2e**

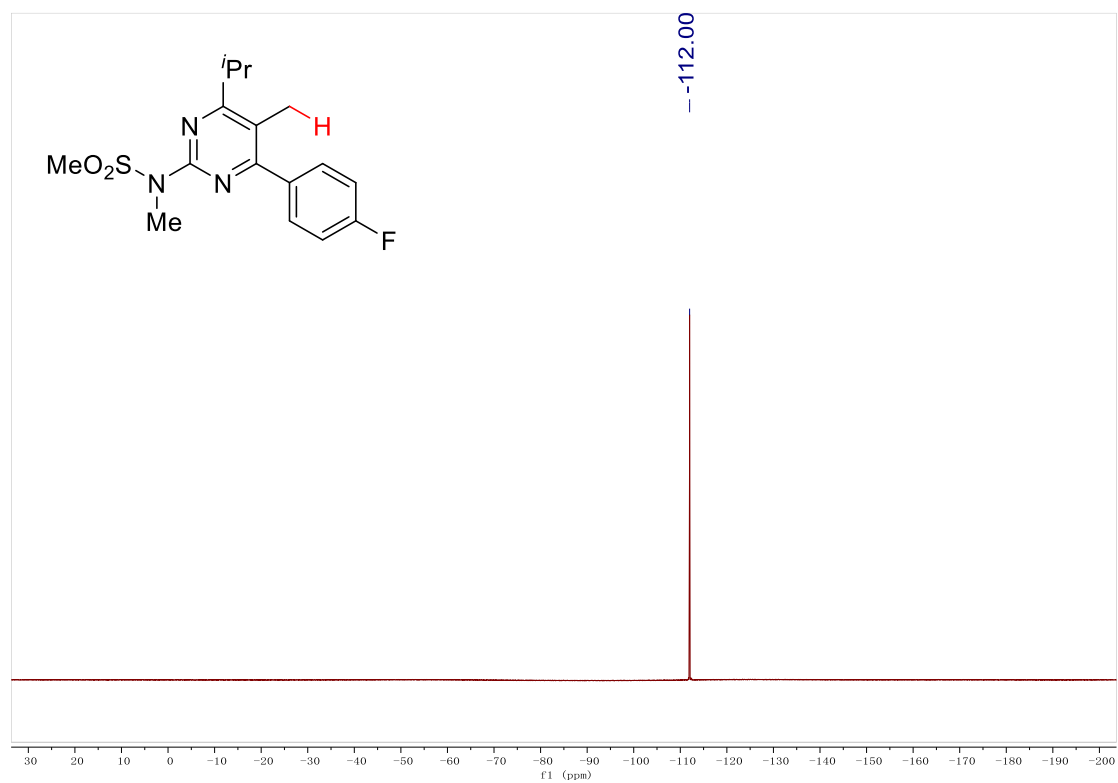

$^{13}\text{C}\{^1\text{H}\}$  NMR (101 MHz,  $\text{CDCl}_3$ ) of **2s**

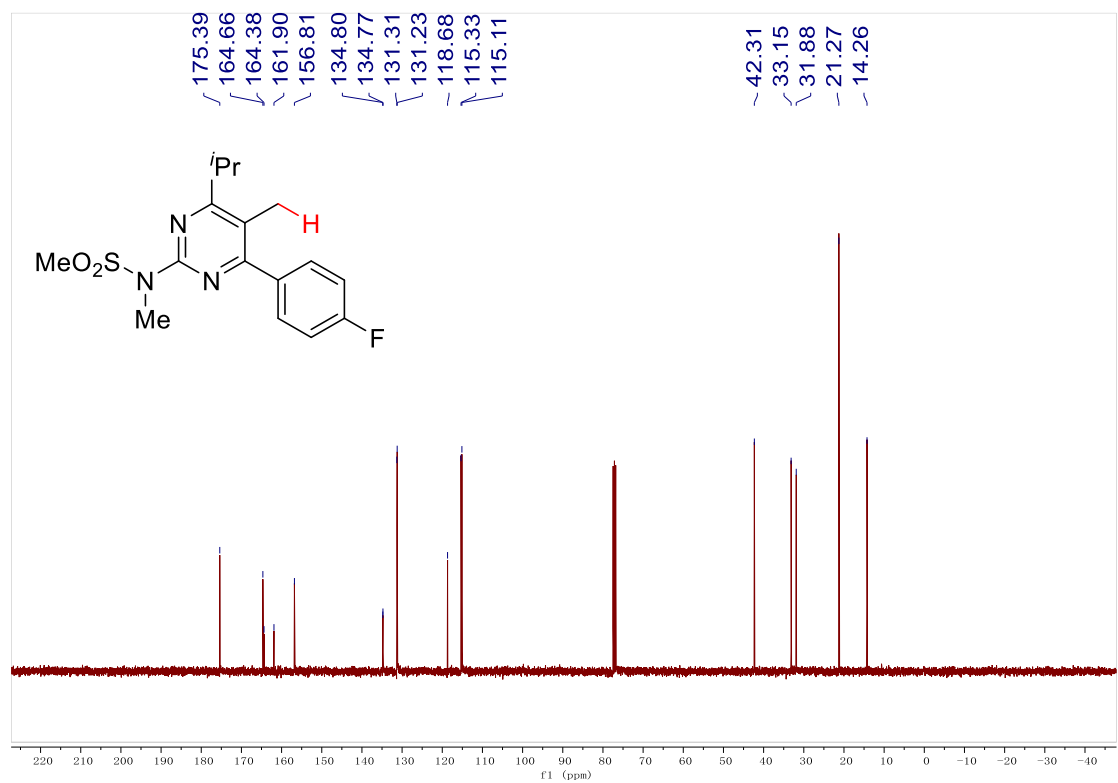

<sup>1</sup>H NMR (400 MHz, CDCl<sub>3</sub>) of **2t**

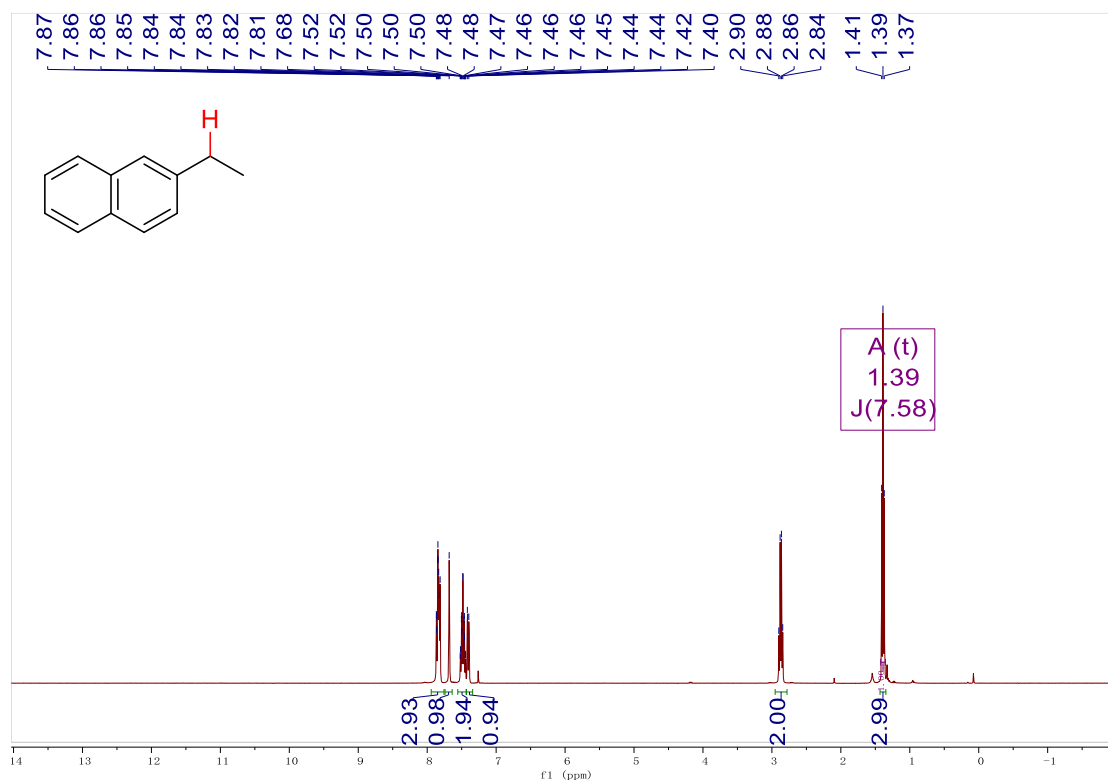

<sup>13</sup>C{<sup>1</sup>H} NMR (101 MHz, CDCl<sub>3</sub>) of **2t**

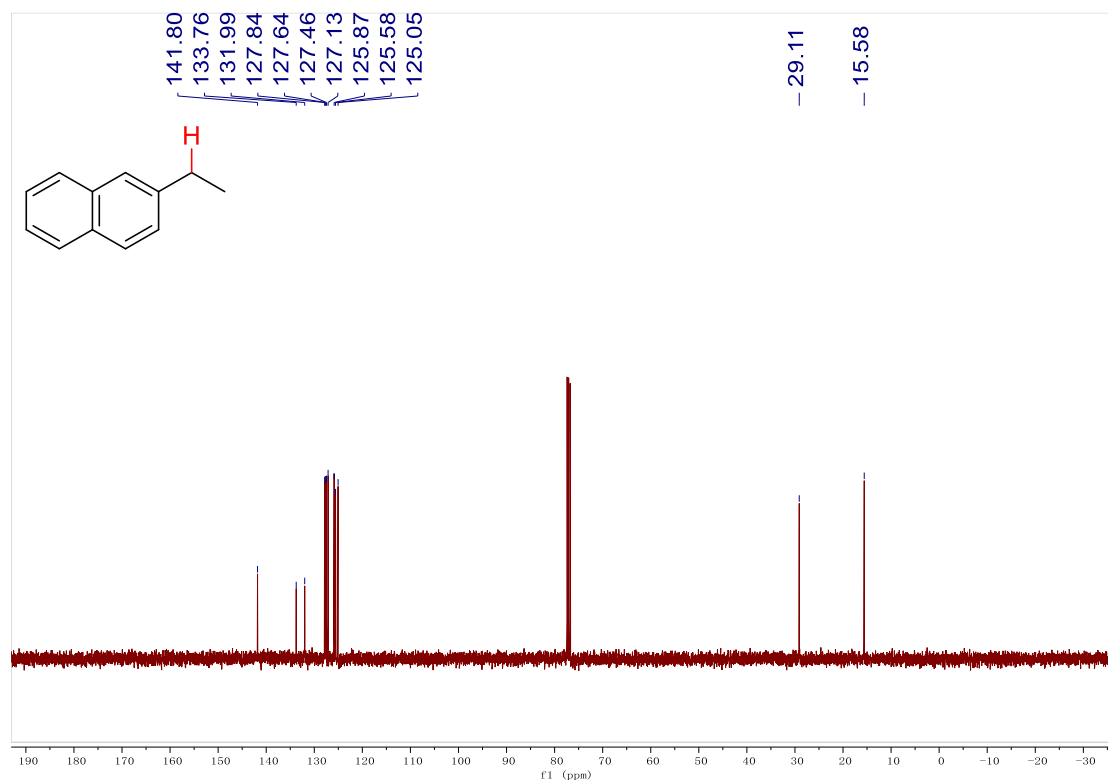

$^1\text{H}$  NMR (400 MHz,  $\text{CDCl}_3$ ) of **2u**

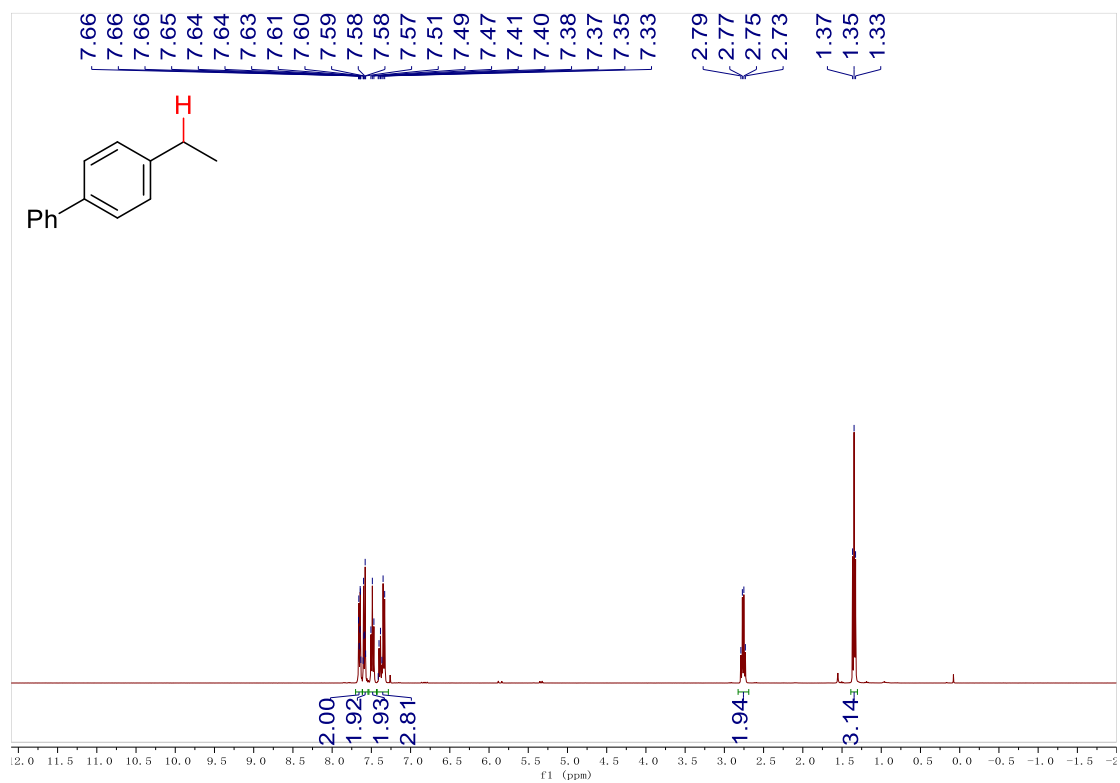

$^{13}\text{C}\{^1\text{H}\}$  NMR (101 MHz,  $\text{CDCl}_3$ ) of **2u**

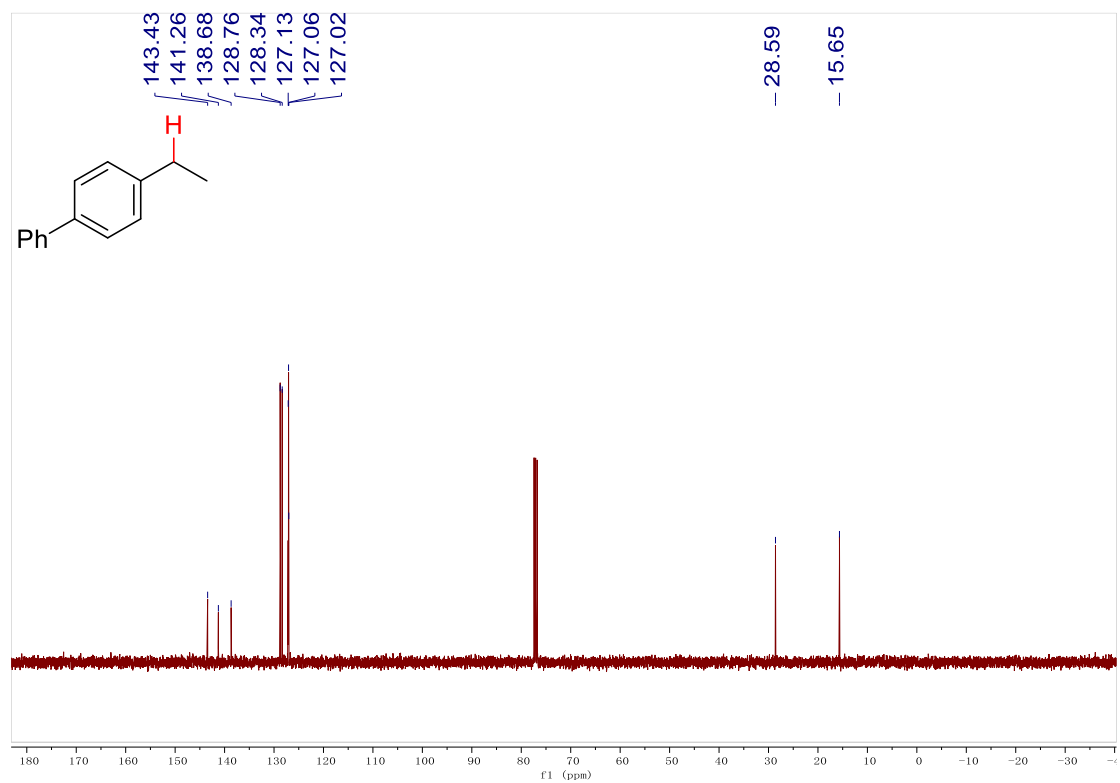

$^1\text{H}$  NMR (400 MHz,  $\text{CDCl}_3$ ) of **2v**

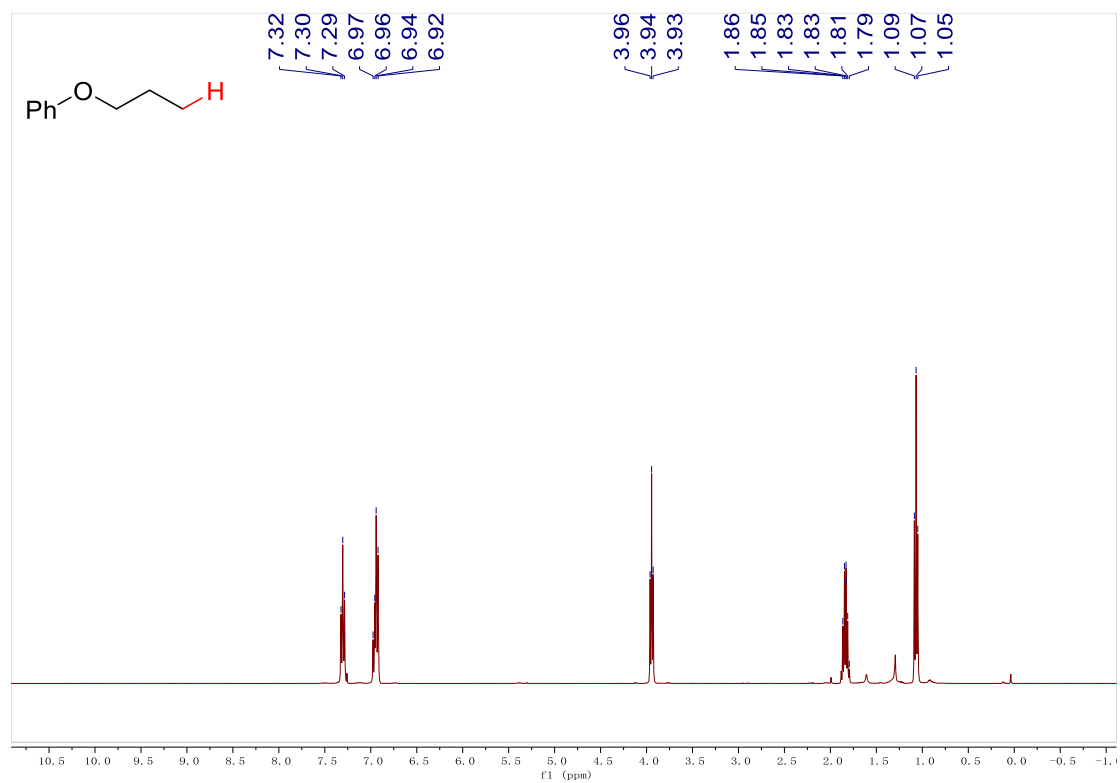

$^{13}\text{C}\{^1\text{H}\}$  NMR (101 MHz,  $\text{CDCl}_3$ ) of **2v**

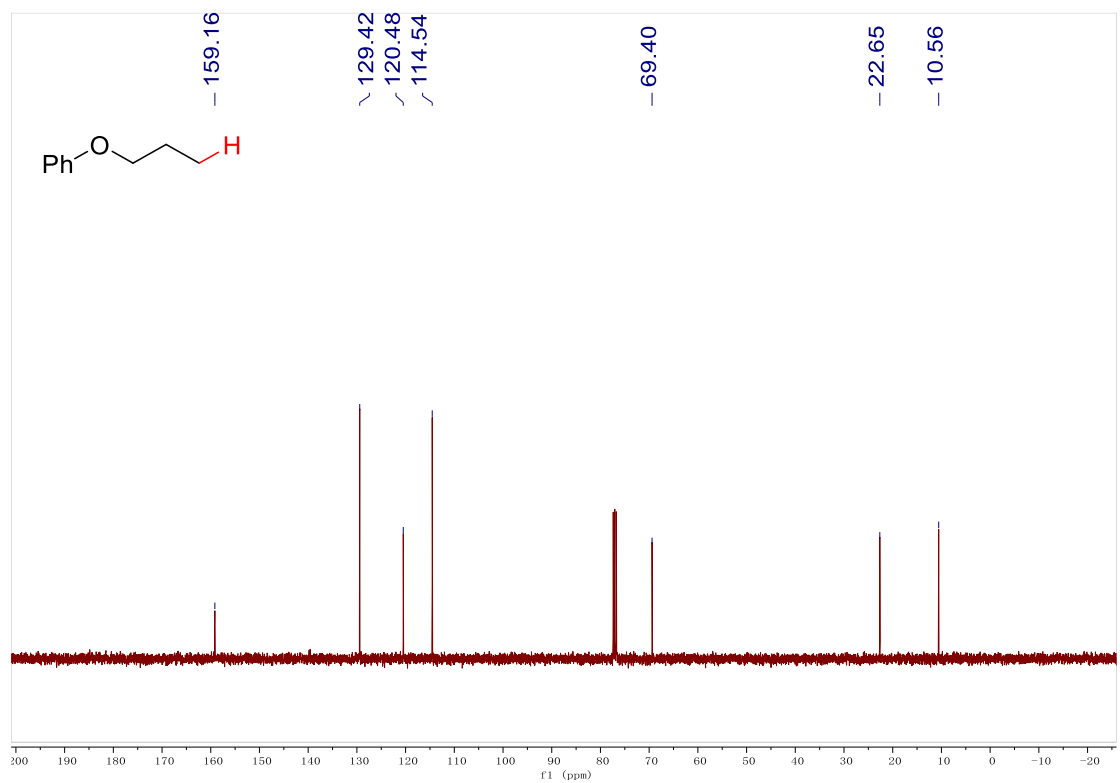



$^1\text{H}$  NMR (400 MHz,  $\text{CDCl}_3$ ) of **2w**

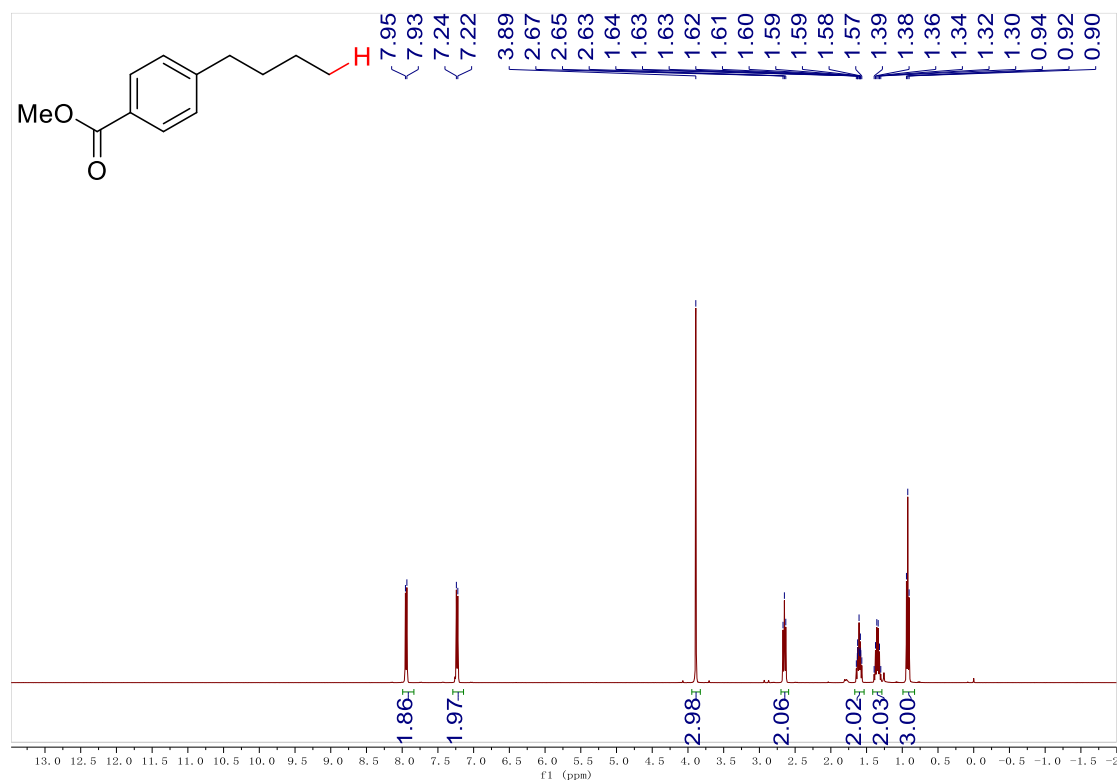

$^{13}\text{C}\{^1\text{H}\}$  NMR (101 MHz,  $\text{CDCl}_3$ ) of **2w**

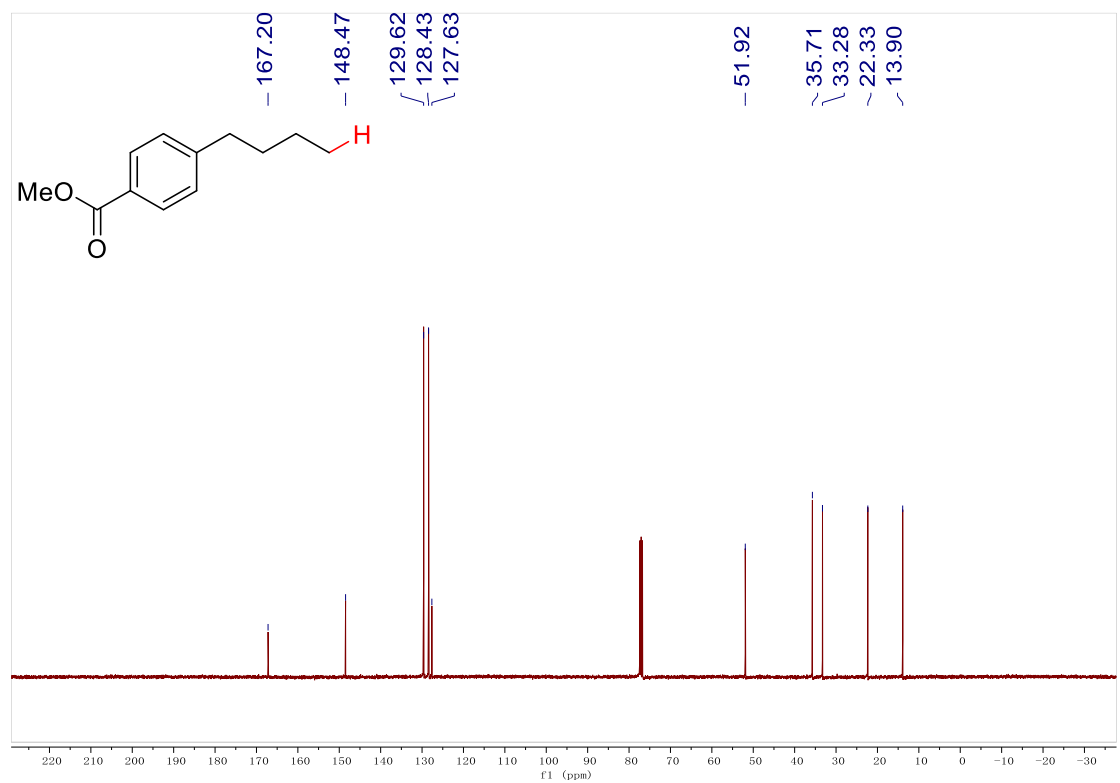

$^1\text{H}$  NMR (400 MHz,  $\text{CDCl}_3$ ) of **2x**

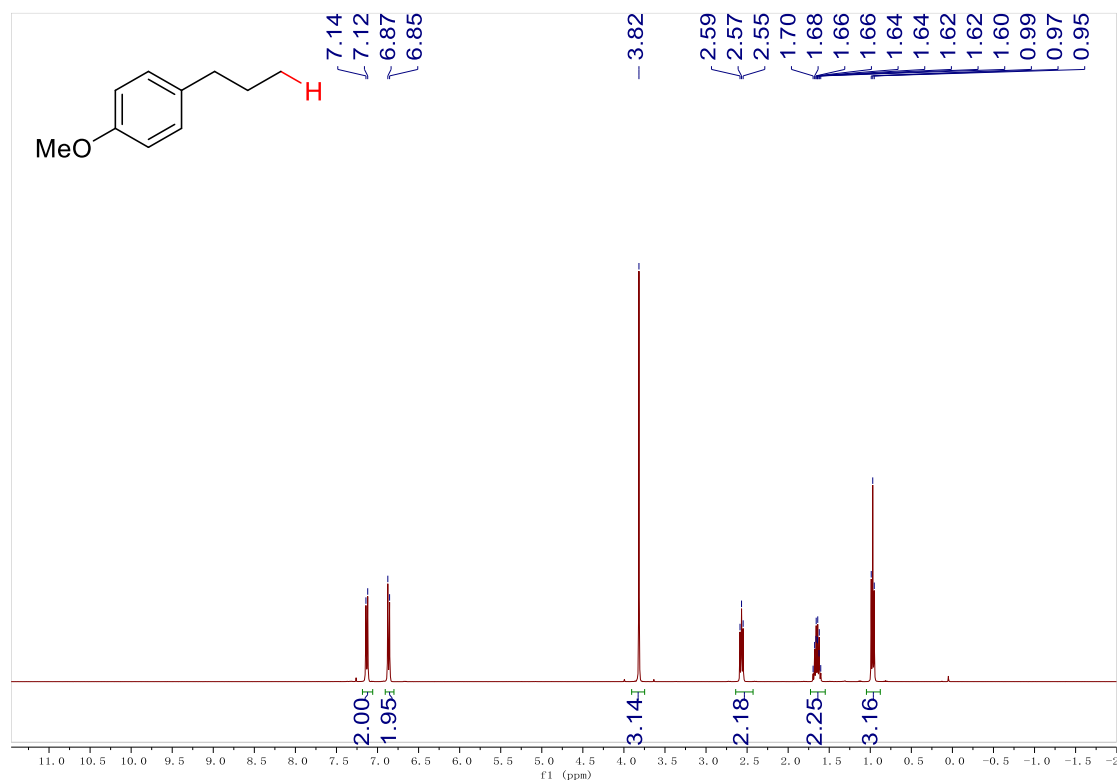

$^{13}\text{C}\{^1\text{H}\}$  NMR (101 MHz,  $\text{CDCl}_3$ ) of **2x**

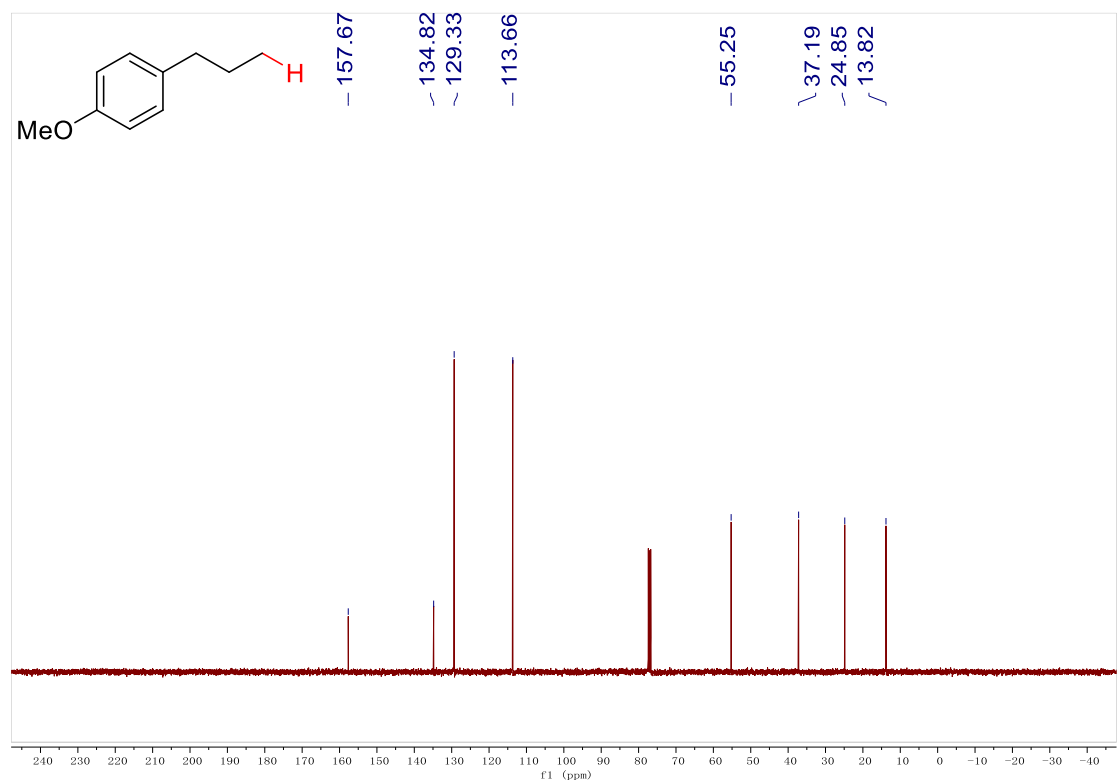

$^1\text{H}$  NMR (400 MHz,  $\text{CDCl}_3$ ) of **2y**

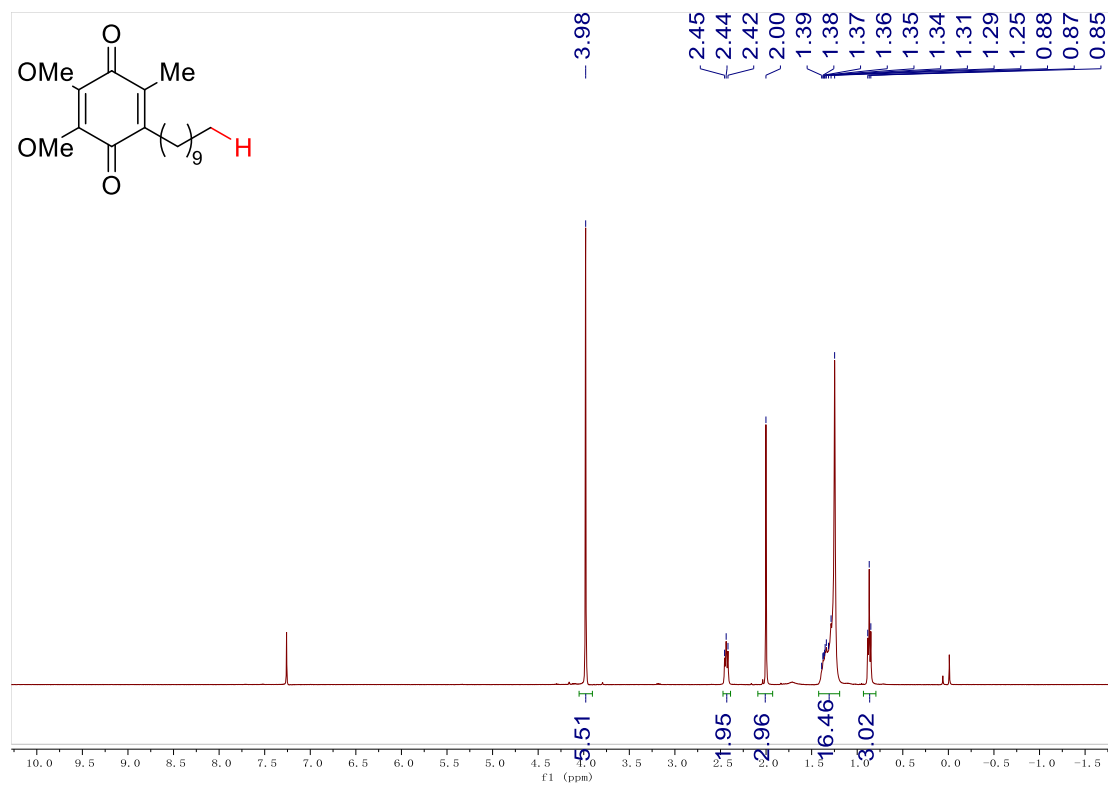

$^{13}\text{C}\{^1\text{H}\}$  NMR (101 MHz,  $\text{CDCl}_3$ ) of **2y**

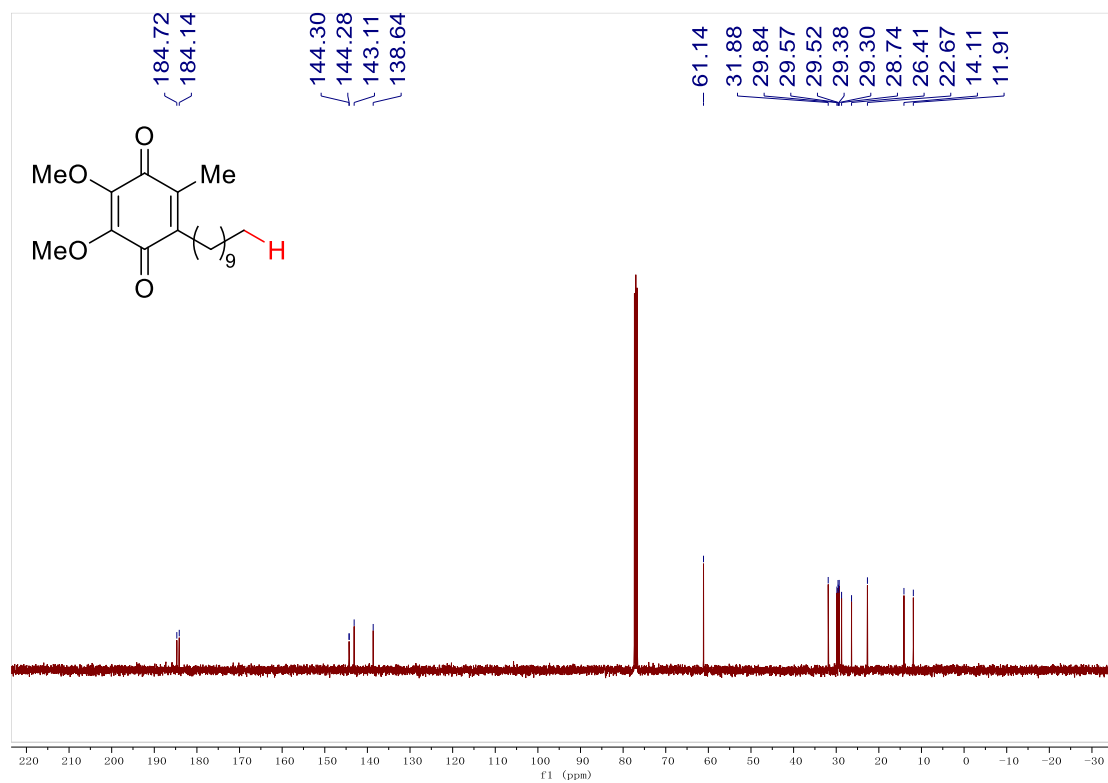

$^1\text{H}$  NMR (400 MHz,  $\text{CDCl}_3$ ) of **2z**

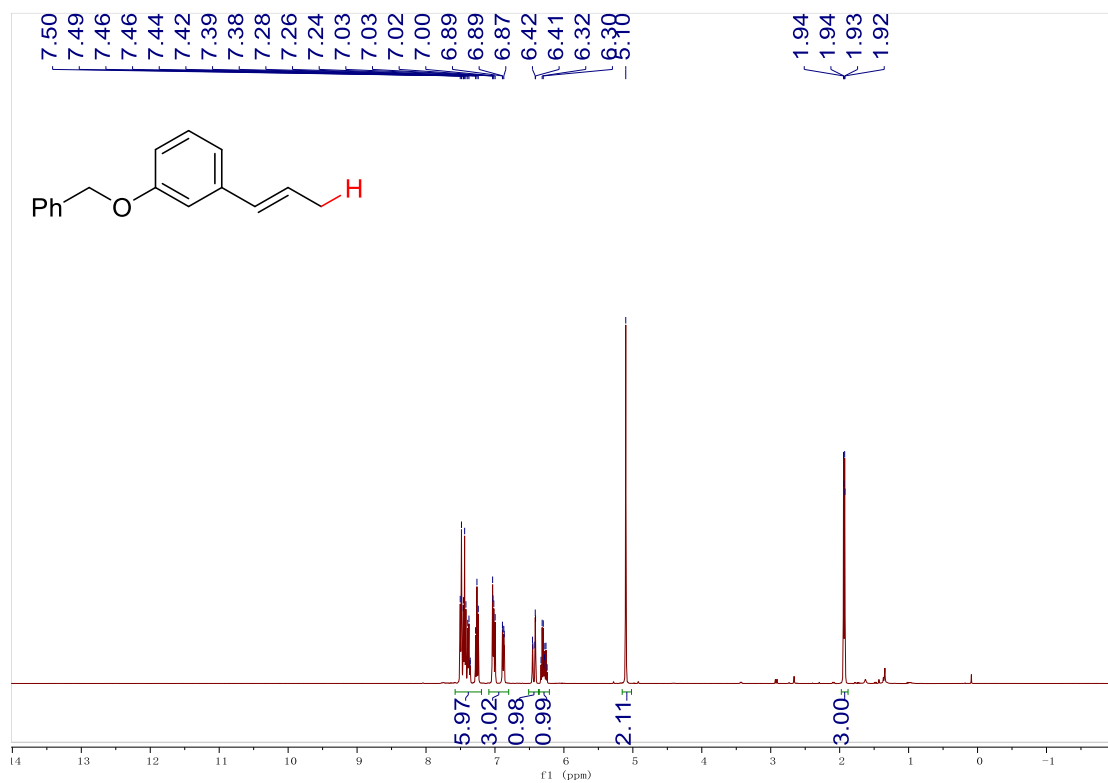

$^{13}\text{C}\{^1\text{H}\}$  NMR (101 MHz,  $\text{CDCl}_3$ ) of **2z**

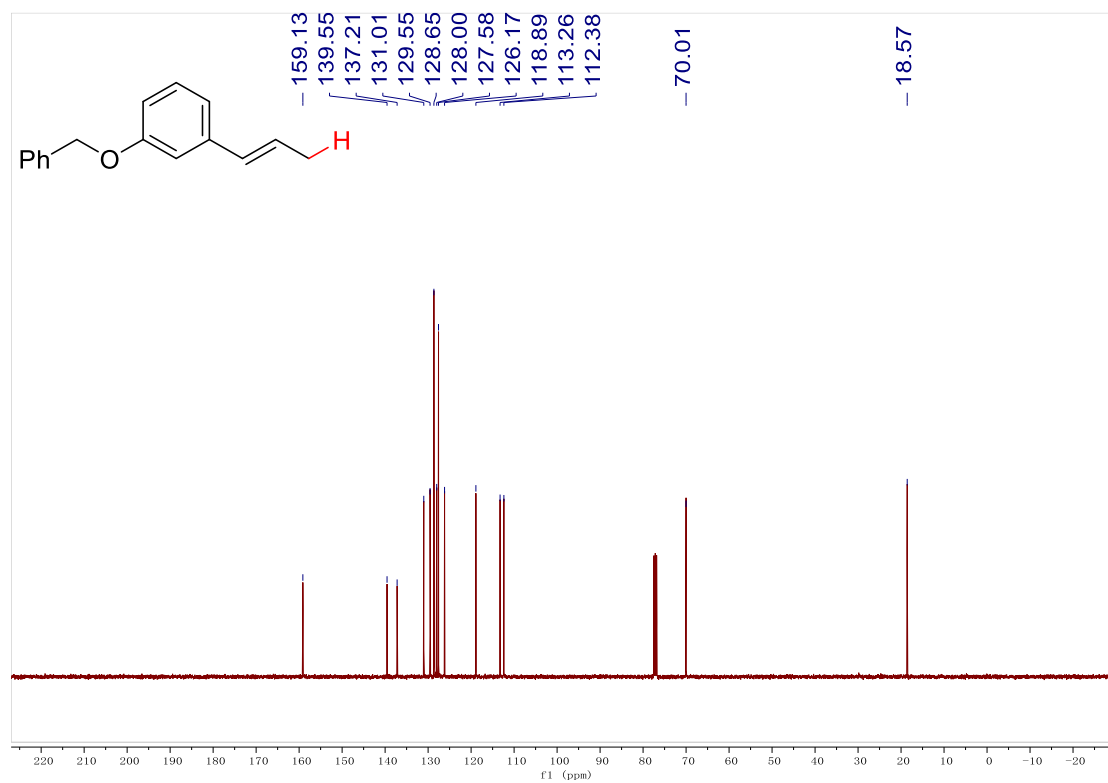

$^1\text{H}$  NMR (400 MHz,  $\text{CDCl}_3$ ) of **2aa**

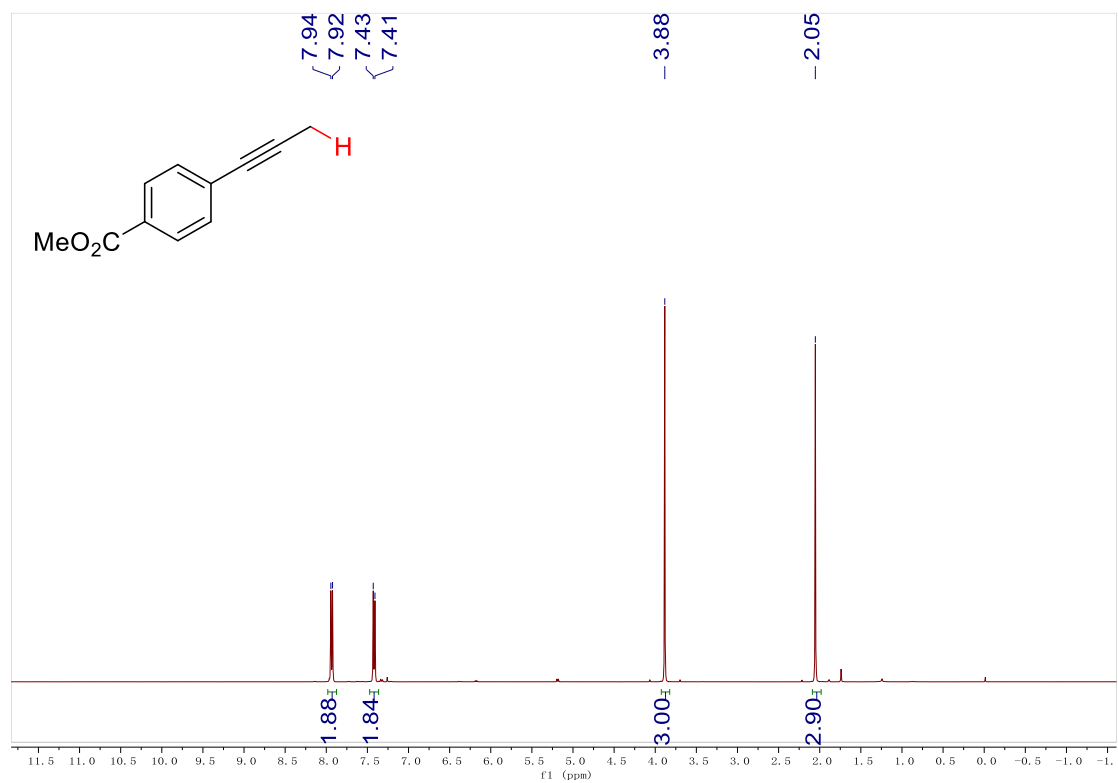

$^{13}\text{C}\{^1\text{H}\}$  NMR (101 MHz,  $\text{CDCl}_3$ ) of **2aa**

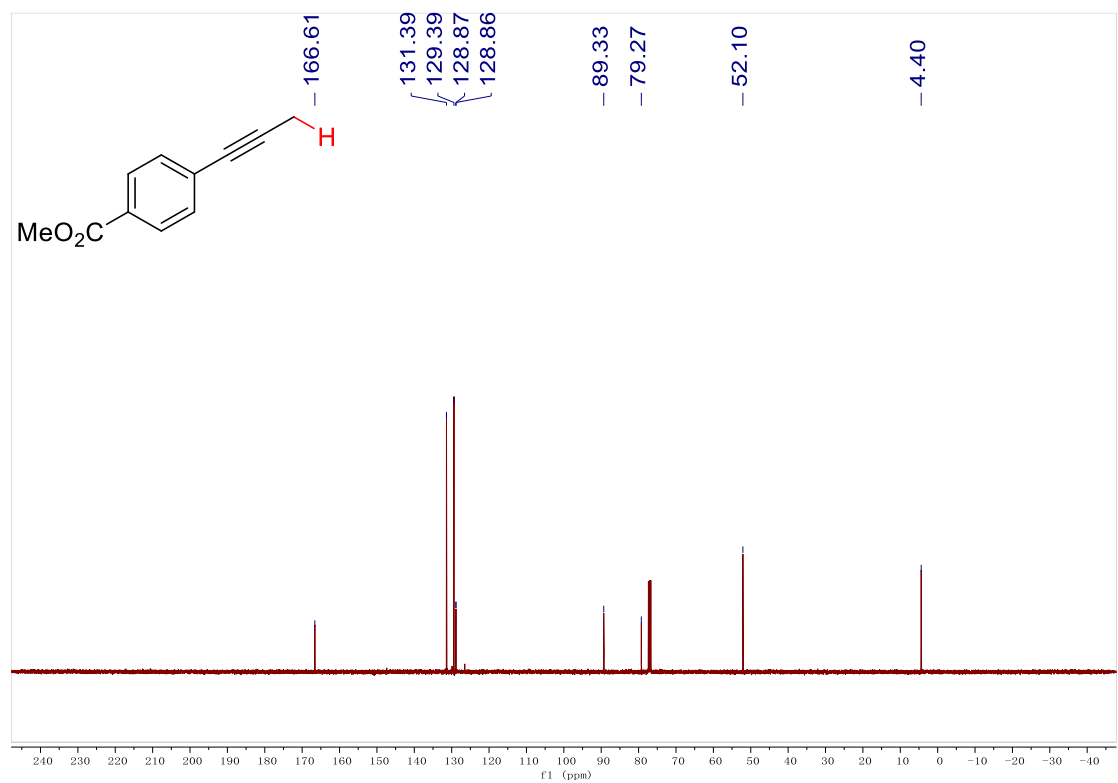

## 5. References

1. D. Khan and I. Parveen, *Eur. J. Org. Chem.*, 2021, **2021**, 4946-4957.
2. N. Weidmann, M. Ketels and P. Knochel, *Angew. Chem. Int. Ed.*, 2018, **57**, 10748-10751.
3. T. Iwasaki, Y. Kohinata and H. Nishide, *Org. Lett.*, 2005 **7**, 755-758.
4. M. Jiang, H.-J. Yang, Y.-H. Jin, L.-Y. Ou and H. Fu, *Synlett*, 2018, **29**, 1572-1577.
5. S. K. Kariofillis, S.-T. Jiang, A. M. Żurański, S. S. Gandhi, J. I. Martinez Alvarado and A. G. Doyle, *J. Am. Chem. Soc.*, 2022 **144**, 1045-1055.
6. R. Jia, J.-J. Wang, Y.-Q. Jiang, B.-Q. Ni and T.-F. Niu, *Org. Biomol. Chem.*, 2022, **20**, 8305-8312.
7. G.-Q. Yuan, J.-H. Zheng, X.-F. Gao, X.-W. Li, L.-B. Huang, H.-J. Chen and H.- F. Jiang, *Chem. Commun.*, 2012, **48**, 7513-7515
8. Z.-H. Sun, R.-X. Ji, J.-T. Wu, J.-Y. Zhao, F. Fang, F. Wang, C. Jiang and Z.-Q. Liu., *Adv. Synth. Catal.*, 2023, **365**, 476-481.
9. D. Qiu, S.-Y. Li, G.-L. Yue, J.-S. Mao, B. Xu, X.-Y. Yuan and F. Ye, *Tetrahedron Lett.*, 2021, **85**, 153478.
10. C. I. Nwachukwu, T. P. McFadden and A. G. Roberts, *J. Org. Chem.*, 2020, **85**, 9979-9992.
11. X.-X. Xi, T.-Q. Chen, J.-S. Zhang and L.-B. Han, *Chem. Commun.*, 2018, **54**, 1521-1524.
12. Y.-P. Zhang, Y.-C. Jiao, Y.-S. Yang and C.-L. Li, *Tetrahedron Lett.*, 2013, **54**, 6494-6497.
13. D.-Y. Han, J. Sun and J. Jin, *Chem. Asian J.*, 2023, **18**, e202201132.
14. P. Tosatti and A. Pfaltz, *Angew. Chem. Int. Ed.*, 2017, **56**, 4579-4582.
15. G.-F. Zhang, C.-F. Guan, L.-J. Han, Y.-Y. Zhao and C.-G. Ding, *Org. Biomol. Chem.*, 2022, **20**, 7640-7644.
16. Q.-C. Yang, Y.-F. Wang, L. Yang and M.-J. Zhang, *Tetrahedron*, 2013, **69**, 6230-6233.
17. B. Han, C.-P. Ren and L.-P. Wu, *Organometallics*, 2023, **42**, 1248-1253.
18. D. Šterk, Z. Časar, M. Jukič, and J. Košmrlj, *Tetrahedron*, 2012, **68**, 2155-2160.
19. X.-L. Zheng, L. Yang, W.-Y. Du, A.-S. Ding, and H. Guo, 2014, *Chem. Asian J.*, 2013, **9**, 439-442.
20. W.-Y. Yang, L. Gao, J. Lu and Z.-L. Song, *Chem. Commun.*, 2018, **54**, 4834-4837.
21. P. J. Rushworth, D. G. Hulcoop, and D. J. Fox, *J. Org. Chem.*, 2013, **78**, 9517-9521.
22. R.-H. Gui and C.-J. Li, *Chem. Commun.*, 2022, **58**, 10572-10575.
23. J. H. Kim, T. Song, and Y. K. Chung, *Org. Lett.*, 2017, **19**, 1248-1251.
